# Supplementary material for: Effectiveness of various treatment modalities in children with vesicoureteral reflux grades II–IV: a systematic review and network meta-analysis
Source: PubMed Central journal article supplement — BMJ Paediatr Open. 2023 Nov 20;7(1):e002096. doi: 10.1136/bmjpo-2023-002096 (PMC10660918; doi:10.1136/bmjpo-2023-002096), 2023-11-20
Supplement: bmjpo-2023-002096.draft_revisions.pdf [file bmjpo-2023-002096.draft_revisions.pdf]

# BMJ Paediatrics Open

BMJ Paediatrics Open is committed to open peer review. As part of this commitment we make the peer review history of every article we publish publicly available.

When an article is published we post the peer reviewers' comments and the authors' responses online. We also post the versions of the paper that were used during peer review. These are the versions that the peer review comments apply to.

The versions of the paper that follow are the versions that were submitted during the peer review process. They are not the versions of record or the final published versions. They should not be cited or distributed as the published version of this manuscript.

BMJ Paediatrics Open is an open access journal and the full, final, typeset and author-corrected version of record of the manuscript is available on our site with no access controls, subscription charges or pay-per-view fees (<http://bmjpaedsopen.bmj.com>).

If you have any questions on BMJ Paediatrics Open's open peer review process please email [info.bmjpo@bmj.com](mailto:info.bmjpo@bmj.com)

# BMJ Paediatrics Open

## Effectiveness of Various Treatment Modalities in Patients with Vesicoureteral Reflux Grade II to IV: A Systematic Review and Network Meta-analysis

|                               |                                                                                                                                                                                                                                                                                                                            |
|-------------------------------|----------------------------------------------------------------------------------------------------------------------------------------------------------------------------------------------------------------------------------------------------------------------------------------------------------------------------|
| Journal:                      | <i>BMJ Paediatrics Open</i>                                                                                                                                                                                                                                                                                                |
| Manuscript ID                 | bmjpo-2023-002096                                                                                                                                                                                                                                                                                                          |
| Article Type:                 | Original research                                                                                                                                                                                                                                                                                                          |
| Date Submitted by the Author: | 26-May-2023                                                                                                                                                                                                                                                                                                                |
| Complete List of Authors:     | Chang, Chia-Lun; Taipei Tzu Chi General Hospital<br>Chen, Chun-Hua; Taipei municipal Wanfang hospital, Taipei, Taiwan.<br>Hsu, Chun-Kai; Taipei Tzu Chi General Hospital<br>Yang, Stephen S.; Taipei Tzu Chi General Hospital<br>chang, shang-jen; National Taiwan University Hospital, ; Taipei Tzu Chi General Hospital, |
| Keywords:                     | Statistics, Nephrology                                                                                                                                                                                                                                                                                                     |
|                               |                                                                                                                                                                                                                                                                                                                            |

SCHOLARONE™  
Manuscripts

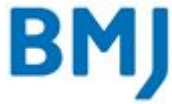

I, the Submitting Author has the right to grant and does grant on behalf of all authors of the Work (as defined in the below author licence), an exclusive licence and/or a non-exclusive licence for contributions from authors who are: i) UK Crown employees; ii) where BMJ has agreed a CC-BY licence shall apply, and/or iii) in accordance with the terms applicable for US Federal Government officers or employees acting as part of their official duties; on a worldwide, perpetual, irrevocable, royalty-free basis to BMJ Publishing Group Ltd ("BMJ") its licensees and where the relevant Journal is co-owned by BMJ to the co-owners of the Journal, to publish the Work in this journal and any other BMJ products and to exploit all rights, as set out in our [licence](#).

The Submitting Author accepts and understands that any supply made under these terms is made by BMJ to the Submitting Author unless you are acting as an employee on behalf of your employer or a postgraduate student of an affiliated institution which is paying any applicable article publishing charge ("APC") for Open Access articles. Where the Submitting Author wishes to make the Work available on an Open Access basis (and intends to pay the relevant APC), the terms of reuse of such Open Access shall be governed by a Creative Commons licence – details of these licences and which [Creative Commons](#) licence will apply to this Work are set out in our licence referred to above.

Other than as permitted in any relevant BMJ Author's Self Archiving Policies, I confirm this Work has not been accepted for publication elsewhere, is not being considered for publication elsewhere and does not duplicate material already published. I confirm all authors consent to publication of this Work and authorise the granting of this licence.

1  
2  
3 Dear chief editors  
4  
5  
6  
7

8 Thank you for considering the manuscript of our “Effectiveness of various treatment modalities  
9  
10 in patients with vesicoureteral reflux Grade II to IV: A systematic review and network meta-  
11  
12 analysis” for publication.  
13

14 This is a systematic review and network meta-analysis study comparing different treatments in  
15  
16 patients with vesicoureteral reflux especially for Grade II to IV. To provide clinicians a better  
17  
18 reference while choosing more effective or suitable intervention for patients suffering  
19  
20 vesicoureteral reflux is what we sincerely aim at.  
21  
22  
23  
24  
25

26 Sincerely yours,  
27

28 Shang-Jen Chang, M.D, MsCE.  
29

30 Department of Urology, National Taiwan University Hospital, Taipei, Taiwan  
31

32  
33 Tel: +886-2-23123456  
34

35 Fax: +886-2-23123456  
36

37 E-mail: [krissygnet@gmail.com](mailto:krissygnet@gmail.com)  
38

39  
40 Address: No.7, Chung Shan S. Rd. ( Zhongshan S. Rd. ) , Zhongzheng Dist., Taipei City,  
41  
42 100225  
43  
44  
45  
46  
47  
48  
49  
50  
51  
52  
53  
54  
55  
56  
57  
58  
59  
60

## Effectiveness of Various Treatment Modalities in Patients with Vesicoureteral Reflux Grade II to IV: A Systematic Review and Network Meta-analysis

Chia-Lun Chang<sup>1,2</sup>, Chun-Hua Chen<sup>3</sup>, Chun-Kai Hsu<sup>1,2</sup>, Stephen Shei-Dei Yang<sup>1,2</sup>, Shang-Jen Chang<sup>1,2,4</sup>

1. Department of Urology, Taipei Tzu Chi Hospital, Buddhist Tzu Chi Medical Foundation, New Taipei City, 231, Taiwan.
2. Department of Urology, School of Medicine, Tzu Chi University, Hualien, 970, Taiwan.
3. Department of Neurology, Taipei municipal Wanfang hospital, Taipei, Taiwan.
4. Department of Urology, National Taiwan University Hospital, Taipei, Taiwan

Address correspondence and reprint requests to: Shang-Jen Chang

Department of Urology, National Taiwan University Hospital, Taipei, Taiwan

Tel: +886-2-23123456

Fax: +886-2-23123456

E-mail: [krissygnet@gmail.com](mailto:krissygnet@gmail.com)

Address: No.7, Chung Shan S. Rd. ( Zhongshan S. Rd. ), Zhongzheng Dist., Taipei City, 100225

### Acknowledgement

The authors would like to thank the team of Taipei Tzu Chi Hospital Library and the research team of Taipei Tzu Chi Hospital for their support in the database search and the development of this paper.

### Funding

This study was supported by a grant from the Taipei Tzu Chi Hospital, Buddhist Tzu Chi Medical Foundation (Grant No. TCRD-TPE-110-12)

### Data availability

All data generated or analyzed during this study are included in this published article.

### Declarations

#### Ethics approval

This is a systematic review and network meta-analysis study. The Research Ethics Committee has confirmed that no ethical approval is required.

#### Conflict of interest

None.

### Author Contributions Statement

C.L Chang and C.H Chen conceptualized and designed the study, performed data collection, data analysis and drafted the original manuscript. C.K Hsu, S.D Yang and S.J. Chang coordinated and supervised data collection, and critically reviewed the manuscript. All authors reviewed and approved the final manuscript as submitted and agree to be accountable for all aspects of the work.

**What is already known on this topic** – reimplantation surgery provides a significantly better reflux resolution in children with vesicoureteral reflux

**What this study adds** – There are no significant differences in UTI recurrence rate, renal scar progressions and new renal scar formation in VUR grades II-IV between antibiotic prophylaxis, endoscopic surgery and reimplantation surgery.

**How this study might affect research, practice or policy** – The choice of treatment should be individualized and risk-based approach. Physicians' and parents' preference

1  
2  
3 should be also considered because of no significant differences between antibiotic prophylaxis,  
4  
5 endoscopic surgery and reimplantation surgery in preventing UTI recurrence and renal scarring.  
6  
7

8  
9

10  
11  
12  
13  
14  
15  
16  
17  
18  
19  
20  
21  
22  
23  
24  
25  
26  
27  
28  
29  
30  
31  
32  
33  
34  
35  
36  
37  
38  
39  
40  
41  
42  
43  
44  
45  
46  
47  
48  
49  
50  
51  
52  
53  
54  
55  
56  
57  
58  
59  
60

Confidential: For Review Only

## ABSTRACT

Background: Vesicoureteral reflux (VUR) is one of the most common risk factors of urinary tract infection (UTI) among children. Various treatment modalities including antibiotic prophylaxis, surgical or endoscopic corrections, and conservative treatment were used depending on the

1  
2  
3 severity of VUR. The aim of this study is to compare the effectiveness of these treatment  
4 modalities in patients with VUR grades II-IV by conducting a systematic review and network  
5 meta-analysis.  
6  
7  
8  
9

10 Methods: A systematic search from different databases was performed from their earliest records  
11 to December 2022 without any language restriction. Only randomized control trials were  
12 included in this study. Effectiveness of treatment modalities were mainly compared by UTI.  
13  
14 Other outcomes for renal scarring and resolution by renal units were also measured between  
15 treatments.  
16  
17  
18  
19  
20

21 Results: A total of 11 studies with 1447 children were included in this study. Surgical correction  
22 significantly provided a better resolution by renal unit than either endoscopic or antibiotic  
23 treatment. Pairwise comparisons for UTI, new renal scar formation, and progression of old  
24 lesions between different treatments showed no significant difference. Network meta-analysis for  
25 UTI revealed that surgical treatment had the least UTI recurrence compared with other  
26 treatments but the results were also not significant. Conclusions: Although surgical treatment  
27 provided a significantly better reflux resolution, each treatment did not significantly differ in  
28 having UTI recurrence, previous renal scars progression and new renal scars formation in VUR  
29 grades II-IV. The choice of treatment should be individualized and risk-based approach.  
30  
31  
32  
33  
34  
35  
36  
37  
38  
39  
40  
41  
42  
43  
44  
45  
46  
47  
48  
49

## 50 **Introduction**

51 Primary vesicoureteral reflux (VUR), the reflux of urine into the ureter or the kidney due to anti-  
52 reflux failure in vesicoureteral junction[1], is a common risk factor of urinary tract infection  
53  
54  
55  
56  
57  
58  
59  
60



1  
2  
3 (UTI) among children. The incidence of VUR among normal children is 0.5 to 3%. [2] However,  
4  
5 in those with UTI combined with VUR, the incidence rises to 30 to 40%. [3, 4] It is also a  
6  
7 potential risk factor for various renal problems like pyelonephritis, renal scarring, and chronic  
8  
9 kidney disease. [5]  
10

11  
12  
13 The grading of VUR is mostly defined by the use of radiographic classification based on the  
14  
15 degree of filling and dilatation of the ureter, renal pelvis, and calyces by the International Reflux  
16  
17 Study group. [6] Voiding cystourethrogram (VCUG) is the gold standard for diagnosing VUR  
18  
19 and defining its severity. The severity of VUR can also be easily assessed with distal ureter  
20  
21 diameter ratio and VUR index score which can also predict for resolution. [7-9]  
22  
23  
24  
25

26 Spontaneous resolution of VUR can be observed in about more than 80% of grades I and II,  
27  
28 around 45% of grade III, and less than 10% of grades IV and V. [10] Various treatment  
29  
30 modalities including antibiotic prophylaxis (AbxP), surgical (Sx Rx) or endoscopic corrections  
31  
32 (Endo Rx), and conservative treatment without antibiotic prophylaxis (no AbxP) are used  
33  
34 depending on the severity of VUR and physicians' preference. [11] Each treatment's  
35  
36 effectiveness varies in preventing UTI and renal damage. Success rate also differs in each  
37  
38 surgical correction method. [12, 13] With good resolution rates, nonoperative management, such  
39  
40 as AbxP and no AbxP, are preferred treatments for low grade VUR. However, Sx Rx is reserved  
41  
42 for high grade VUR due to a potential risk of renal damage. [14]  
43  
44  
45  
46  
47

48 Previous meta-analytic studies [15-17] examined treatments mostly for low grade (I, II) and high  
49  
50 grade (III, IV, V). However, in practice, children with grade V VUR is associated with a very  
51  
52 high risk of recurrent UTI and renal scarring, and therefore, AbxP alone may not be sufficient for  
53  
54 these patients and rarely enrolled in randomized controlled study. On the contrary, surgery is  
55  
56  
57  
58  
59  
60

1  
2  
3 rarely used to treat grade I VUR patients. Having the high probability of rapid spontaneous  
4 resolution in VUR grade I, and concerning the high incidence of associated renal dysplasia or  
5 potential risk of renal damage in VUR grade V, the choice of treatment for these two grades is  
6 clear and more standardized. Therefore, most randomized control trials (RCTs) comparing AbxP,  
7 Endo Rx, or reimplantation include VUR grades II-IV patients. Herein, the aim of this study is to  
8 compare the effectiveness of these treatment modalities in managing patients with VUR grades  
9 II, III, and IV by conducting a systematic review and network meta-analysis.  
10  
11  
12  
13  
14  
15  
16  
17  
18  
19  
20  
21  
22

## 23 **Methods**

### 24 **Search strategy**

25  
26  
27 A systematic search was conducted in different databases including Pubmed, Embase, and  
28 Google scholar using both free text and MESH terms (vesicoureteral reflux; vesicoureteral  
29 reimplantation; endoscopic treatment or antibiotic prophylaxis). All databases were searched  
30 from their inceptions to December 2022 without any language restriction. The search was  
31 performed according to the Preferred Reporting Items for Systematic Reviews Involving a  
32 Network Meta-Analysis (PRISMA-NMA) statement. The number of included and excluded  
33 studies were reported at each stage.  
34  
35  
36  
37  
38  
39  
40  
41  
42  
43  
44  
45  
46

### 47 **Selection criteria**

48  
49  
50 Abstracts of the identified articles were manually reviewed, and full texts were assessed for those  
51 without clear eligibility. Only were RCT studies comparing any two of four treatments  
52 (vesicoureteral reimplantation, endoscopic treatment, antibiotic prophylaxis, or surveillance with  
53  
54  
55  
56  
57  
58  
59  
60

1  
2  
3 no antibiotic prophylaxis) for managing primary VUR grades II-IV included in this study.

4  
5 Studies which examined treatments for VUR grades I-V and provided separate results for each  
6  
7  
8 grade were also eligible for inclusion.

9  
10  
11 Articles were excluded if treatment outcomes were not directly compared or if duplicate data on  
12  
13 the same cohort were reported. Studies with primary VUR grade I or V and those with secondary  
14  
15 VUR, such as posterior urethral valves, neurological abnormalities, other urological  
16  
17 abnormalities, and kidney transplants, were also excluded.

### 21 **Treatment modalities**

22  
23  
24  
25 Different treatment modalities for VUR grades II-IV reported in the included studies were AbxP,  
26  
27 no AbxP, Sx Rx, and Endo Rx.

### 31 **Data extraction**

32  
33  
34 Two investigators (C.L. Chang and C.H. Chen) extracted the data from each eligible study,  
35  
36 including urinary tract infection (UTI), renal scarring for both old lesion progression and new  
37  
38 scars formation, as well as resolution of VUR by cases and renal units. Another four  
39  
40 investigators (C.K Hsu, Stephen S.D. Yang, Y.C Tsai and S.J. Chang) checked the accuracy of  
41  
42 extracted data, and a custom piloted spreadsheet was used for comparing those data for each  
43  
44  
45 variable of interest.

### 49 **Outcomes**

50  
51  
52 Primary outcome was to compare the rate of urinary tract infection (UTI) according to the  
53  
54  
55 criteria defined by each study between treatment modalities.

1  
2  
3 Secondary outcomes were the rate of worsening of previous renal scars (i.e. progression of old  
4  
5 lesions) and formation of new renal scars usually followed by technetium-99 m-labelled  
6  
7 dimercaptosuccinic acid (99mTc-DMSA) scintigraphy and also the resolution rate of VUR.  
8  
9

### 10 11 **Risk of bias assessment**

12  
13 The Cochrane Collaboration risk of bias tool (RoB2) was used, and risks of bias, such as  
14  
15 selection, performance, detection, attrition, and reporting bias, were evaluated for each included  
16  
17 study.[18] Each item was rated as either low risk of bias, some concern (either lack of  
18  
19 information or uncertainty over the potential for bias) or high risk of bias.  
20  
21  
22  
23  
24

### 25 **Statistical analysis**

26  
27 Pairwise comparisons between studies were performed by Revman 5.4 software  
28  
29 (www.cochrane.org), and R program software was used for conducting network meta-analysis.  
30  
31 Frequentist model was adopted using netmeta package for estimating each treatment's effect.  
32  
33 The statistical heterogeneity between the studies was measured by  $I^2$  and  $Q_{total}$  showing the  
34  
35 overall inconsistency in the network. Network consistency was checked with netsplit  
36  
37 method.[19] We conducted a pooled analysis of dichotomous outcomes using odds ratios (ORs)  
38  
39 for pairwise comparisons and odds ratios in logarithmic scale (log ORs) for comparisons in  
40  
41 network meta-analysis. Random-effects method was used to overcome the high heterogeneity  
42  
43 between studies.  
44  
45  
46  
47  
48  
49

## 50 **Results**

### 51 **Search strategy and study characteristics**

52  
53  
54  
55  
56  
57  
58  
59  
60

1  
2  
3 The selection of articles was conducted according to the Preferred Reporting Items for  
4 Systematic Reviews and Meta-Analyses (PRISMA) guidelines, and a total of 820 studies were  
5 initially selected. A final sample of 11 studies including 1447 children with VUR grades II-IV  
6 were included, and the detailed process of selection is demonstrated in Fig 1. All 11 studies were  
7 randomized control trials and all of which were published in English language. The oldest age of  
8 enrolled children was 18 years. Follow up periods varied from 1 to 5 years. Characteristics of  
9 the included studies are summarized in Table (1).  
10  
11  
12  
13  
14  
15  
16  
17  
18  
19  
20  
21

### 22 **Risk of bias**

23  
24 Nearly half of the included studies reported unclear information about randomization, allocation,  
25 and blinding of outcome assessment. Two studies[20, 21] had severe missing outcome data, and  
26 they were rated as high risk of bias in missing outcome data. Half of the included studies were  
27 considered for some concern as having bias in selection of reported results. For the overall bias,  
28 approximately 20% of the included studies were considered having a high risk of bias, and the  
29 results were summarized in Fig 2 (a) and (b).  
30  
31  
32  
33  
34  
35  
36  
37  
38  
39

### 40 **Evaluation of inconsistency and fitness of the model of the network meta-analysis**

41  
42 The network evidence of UTI for four treatment modalities was demonstrated with network  
43 graph (Fig 3) including a total of 9 studies. Our model showed two strong arms (AbxP vs no  
44 AbxP and AbxP vs Sx Rx) each including 3 studies, and it consisted of a closed loop between  
45 AbxP, Sx Rx, and Endo Rx. Both results of direct and indirect methods calculated by the netsplit  
46 method did not show a significant difference between them ( $p = 0.99$ ). Therefore, no  
47 inconsistency was found in our model. For the fitness of model, only the studies which reported  
48  
49  
50  
51  
52  
53  
54  
55  
56  
57  
58  
59  
60

1  
2  
3 the outcomes of VUR grades II-IV were included, and fixed effect model was used due to overall  
4  
5 low heterogeneity among studies (Q value = 0.91).  
6  
7  
8  
9

## 10 **Synthesis of results**

11  
12 In this study, the effectiveness of treatment modalities was pooled analyzed with primary  
13  
14 outcomes (urinary tract infection) simultaneously measured by network meta-analysis. Other  
15  
16 outcomes such as renal scarring and resolution by renal units were only analyzed by pairwise  
17  
18 meta-analysis due to limited studies between treatments.  
19  
20  
21  
22  
23

## 24 **Urinary tract infection**

25  
26 A total of 9 studies[21-29] including 1013 participants reported the incidence of post-treatment  
27  
28 UTI. The definitions of UTI were positive urine culture and symptomatic or febrile UTI. Some  
29  
30 studies did not report information about UTI definition.  
31  
32  
33  
34

## 35 **Pairwise comparisons of UTI between different treatment modalities**

36  
37 There was no significant difference in UTI recurrence among the treatment modalities. Sx Rx  
38  
39 was associated with less UTI than AbxP, but the difference was not significant (OR = 0.75, 95%  
40  
41 CI = 0.43 to 1.29, p = 0.3). Endo Rx showed a higher risk of UTI than AbxP, but the difference  
42  
43 was not significant (OR = 2.03, 95% CI = 0.89 to 4.64, p = 0.09). Finally, there was no  
44  
45 significant difference in UTI recurrence between AbxP or no AbxP (OR = 1.07, 95% CI = 0.51  
46  
47 to 2.24, p = 0.86). All results for each treatment comparison are reported in Table (2).  
48  
49  
50  
51  
52  
53

## 54 **Results from network meta-analysis**

1  
2  
3 Sx Rx showed the lowest risk of UTI compared with other treatments reporting in Fig (4).  
4  
5 However, the mixed comparison results were not significant with low heterogeneity.  
6  
7  
8  
9

### 10 **Progression of old lesions**

11  
12 A total of 4 studies[20, 24-26] were pooled for the analysis. Three studies compared AbxP and  
13  
14 Sx Rx, and one compared AbxP and no AbxP. The pooled result showed that AbxP had potential  
15  
16 for more progression of old lesions than Sx Rx (OR = 1.23, 95% CI = 0.79 to 1.93, p = 0.36), but  
17  
18 the result was not significant.  
19  
20  
21  
22  
23

### 24 **Formation of new renal scar**

25  
26 A total of 3 studies[20, 25, 29] with 641 participants were included. Two studies comparing  
27  
28 AbxP and Sx Rx were pooled for pairwise comparison, and no significant result was found  
29  
30 between them (OR = 0.86, 95% CI = 0.51 to 1.44, p = 0.56). Another study compared AbxP, no  
31  
32 AbxP, and Endo Rx, and the results for these comparisons are reported in Table (2).  
33  
34  
35  
36  
37

### 38 **Resolution by renal units (RRU)**

39  
40 Of 4 studies[26-28, 30] which reported corrected VUR by renal units, 2 studies consisting of 160  
41  
42 participants compared Sx Rx and Endo Rx. The other 2 studies compared Sx Rx and AbxP as  
43  
44 well as Endo Rx and AbxP. Sx Rx showed a significantly better resolution rate of VUR than  
45  
46 Endo Rx (OR = 5.02, 95% CI = 1.47 to 17.13, p = 0.01). Both Sx Rx and Endo Rx showed better  
47  
48 resolutions than AbxP, and the results are reported in Table (2).  
49  
50  
51  
52  
53

### 54 **Discussion**

1  
2  
3 To our knowledge, this is the first network meta-analysis that compared different treatment  
4 modalities for patients with VUR grades II-IV. The effectiveness of each treatment in preventing  
5 the occurrence of post-treatment UTI was simultaneously compared by conducting network  
6 meta-analysis. Sx Rx showed the best outcome in reducing post-treatment UTI among patients  
7 with VUR grades II-IV followed by AbxP, no AbxP, and Endo Rx consecutively. However,  
8 mixed comparison results showed no significant differences. Pairwise comparisons for post-  
9 treatment UTI, progression of old lesions, and formation of new renal scar showed no significant  
10 differences between the treatment modalities. However, Sx Rx provided a better resolution rate  
11 of VUR grades II-IV than Endo Rx and AbxP.  
12  
13  
14  
15  
16  
17  
18  
19  
20  
21  
22  
23  
24  
25

26 Children with VUR have a high spontaneous resolution rate within the first 4-5 years of life.[31,  
27 32] Male sex, young age, unilateral VUR have good resolution rate. Besides, it is also believed  
28 that VUR alone is not likely to cause renal damage without the presence of UTI.[33] Risk factors  
29 for UTI includes young age, high grade VUR, female sex and circumcision status in boys.  
30 Presence of bladder bowel dysfunction is also one of the important factors that influence VUR  
31 resolution rate and increase UTI risk.[34]  
32  
33  
34  
35  
36  
37  
38  
39  
40  
41

42 ABxP is commonly used for children with VUR to prevent UTI recurrence. However, several  
43 studies have examined age, gender and VUR severity to determine the efficacy of AbxP, and the  
44 results remain controversial. Swedish reflux study [29] and RIVUR trial[35] supported using  
45 AbxP because of its significant reduction in UTI recurrence, but PRIVENT study[23] found a  
46 limited effect of AbxP. A recent meta-analysis[17] comparing all grades of VUR showed that  
47 recurrent UTI was less in AbxP than no AbxP group. In our study, there was no significant  
48  
49  
50  
51  
52  
53  
54  
55  
56  
57  
58  
59  
60



1  
2  
3 difference between AbxP and other treatments for UTI and renal damage. This may be due to  
4  
5 differences in age, gender and VUR severity of included studies.  
6  
7

8  
9  
10 Antibiotic resistance is an emerging problem for AbxP,[36] and this may affect the treatment  
11  
12 outcomes. Adverse effects of long-term antibiotic use such as allergic reaction, weaken immune  
13  
14 system and *Clostridium difficile* infection should also be considered. Becoming less effectiveness  
15  
16 of AbxP, active surveillance without AbxP can be an alternative option. Being alert for febrile  
17  
18 UTI and early treatment to prevent renal damage are necessary. Therefore, understanding and  
19  
20 compliance of the parents play an important role for active surveillance.  
21  
22  
23

24  
25  
26 Ureteral reimplantation has been used for decades with the most successful outcome for the  
27  
28 correction of VUR. The principle of surgical correction is to mimic or strengthen the antireflux  
29  
30 mechanism by creating the longer ureteral segment passing the tunnel between bladder mucosa  
31  
32 and muscularis propria. Lich–Gregoir extravesical antireflux technique, Cohen intravesical  
33  
34 reimplantation, and Politano–Leadbetter combined intra- and extravesical reimplantation  
35  
36 technique are most commonly used methods.[37] Sx Rx included in our study are open ureteral  
37  
38 reimplantation methods, mostly Cohen and Politano-Leadbetter technique. Despite a significant  
39  
40 better resolution by renal units in Sx Rx, no significant difference was found in recurrent UTI  
41  
42 and renal damage in our study. These results coincide with other meta-analyses[16, 17].  
43  
44  
45  
46  
47  
48

49  
50 Most of the included studies did not report about surgical complications except two studies.[21,  
51  
52 27] Ureteral stricture is one of possible complications of Sx Rx. Long term report of IRS study  
53  
54 showed postoperative unilateral obstruction (6.6%, 10 in 151 patients) in which 7 patients (4.7%)  
55  
56  
57  
58  
59  
60

1  
2  
3 needed further surgery.[21] Garcia-Aparicio et al also reported mild postoperative complications  
4  
5 with hematuria (5.2%) and bladder spasm (5.2%).[27]  
6  
7  
8  
9

10 Another treatment option for VUR is Endo Rx which has been introduced over the last two  
11  
12 decades [38]. Different bulking agents can be injected at ureteric orifice with the Traditional  
13  
14 Subureteric Teflon Injection (STING) technique or Hydrodistension implantation technique  
15  
16 (HIT) including the double HIT.[39] However, the choice of bulking agents may impact the  
17  
18 safety and efficacy of Endo Rx as granuloma formation due to foreign body reaction, migration  
19  
20 from injection site and periureteric fibrosis. Dextranomer/ hyaluronic acid (Dx/HA) showed low  
21  
22 complication rates with short-term hematuria (0.2-0.8%), ureteral obstruction (0.5-1.3%),  
23  
24 calcification (0.5%) and late ureteral implantation (2.7%).[40] Although Endo Rx showed  
25  
26 significantly lower resolution rate than Sx Rx, it is less invasive and uses easier technique than  
27  
28 Sx Rx. However, clinicians must balance risks and benefits of each procedure as well as their  
29  
30 own surgical experiences.  
31  
32  
33  
34  
35  
36  
37

38 Limitations of this study should be addressed. For low risks of bias, only randomized control  
39  
40 studies were included in this study. As many studies did not report separate data for VUR grades  
41  
42 II-IV, they were excluded from current study for network consistency and transitivity. Mixed  
43  
44 treatment comparison could be performed by network meta-analysis only for UTI recurrence,  
45  
46 and the rest parameters could only be compared with pairwise comparisons. Moreover, robotic  
47  
48 assisted surgery has been used to correct VUR in children with body weight >10 kg [41, 42]  
49  
50 while our study did not include it in this study. Therefore, future research should consider  
51  
52 including robotic assisted surgery as one of the treatment modalities. Last, but not least, our  
53  
54  
55  
56  
57  
58  
59  
60

study could not consider patients' age, febrile or symptomatic UTI, follow up times, and publication years because of limited included studies.

## Conclusion

Despite a significantly better resolution of VUR after surgical treatment, the evidence for UTI recurrence, previous renal scar progression and new renal scar formation showed no significant difference in VUR grades II-IV treated with various treatment modalities. The findings of this study may provide evidence-based suggestions for the choice of treatment which should be individualized and risk-based approach.

## References

1. Chandra, M., *Reflux nephropathy, urinary tract infection, and voiding disorders*. *Curr Opin Pediatr*, 1995. **7**(2): p. 164-70.
2. Sargent, M.A., *What is the normal prevalence of vesicoureteral reflux?* *Pediatr Radiol*, 2000. **30**(9): p. 587-93.
3. Hunziker, M., E. Colhoun, and P. Puri, *Prevalence and predictors of renal functional abnormalities of high grade vesicoureteral reflux*. *J Urol*, 2013. **190**(4 Suppl): p. 1490-4.
4. Hoberman, A., et al., *Imaging studies after a first febrile urinary tract infection in young children*. *N Engl J Med*, 2003. **348**(3): p. 195-202.
5. Keren, R., et al., *Risk Factors for Recurrent Urinary Tract Infection and Renal Scarring*. *Pediatrics*, 2015. **136**(1): p. e13-21.
6. Lebowitz, R.L., et al., *International system of radiographic grading of vesicoureteric reflux. International Reflux Study in Children*. *Pediatr Radiol*, 1985. **15**(2): p. 105-9.
7. Arlen, A.M., et al., *Validation of the ureteral diameter ratio for predicting early spontaneous resolution of primary vesicoureteral reflux*. *J Pediatr Urol*, 2017. **13**(4): p. 383.e1-383.e6.
8. Garcia-Roig, M., et al., *Vesicoureteral Reflux Index: Predicting Primary Vesicoureteral Reflux Resolution in Children Diagnosed after Age 24 Months*. *J Urol*, 2017. **197**(4): p. 1150-1157.
9. Ntoulia, A., et al., *Contrast-enhanced voiding urosonography (ceVUS) with the intravesical administration of the ultrasound contrast agent Optison™ for vesicoureteral reflux detection in children: a prospective clinical trial*. *Pediatr Radiol*, 2018. **48**(2): p. 216-226.

10. Shimada, K., et al., [*Spontaneous resolution of reflux in children with primary VUR*]. *Nihon Hinyokika Gakkai Zasshi*, 1990. **81**(7): p. 982-7.
11. Springer, A. and R. Subramaniam, *Relevance of current guidelines in the management of VUR*. *Eur J Pediatr*, 2014. **173**(7): p. 835-43.
12. Teixeira, C.B.B., M.A.d.P. Cançado, and J.T.d.A. Carvalhaes, *Primary vesicoureteral reflux: conservative therapy or surgical intervention*. *Brazilian Journal of Nephrology*, 2014. **36**: p. 10-17.
13. Williams, G., E.M. Hodson, and J.C. Craig, *Interventions for primary vesicoureteric reflux*. *Cochrane Database Syst Rev*, 2019. **2**(2): p. Cd001532.
14. Teixeira, C.B., M.A. Cançado, and J.T. Carvalhaes, [*Primary vesicoureteral reflux: conservative therapy or surgical intervention*]. *J Bras Nefrol*, 2014. **36**(1): p. 10-7.
15. Wheeler, D., et al., *Antibiotics and surgery for vesicoureteric reflux: a meta-analysis of randomised controlled trials*. *Arch Dis Child*, 2003. **88**(8): p. 688-94.
16. Mina-Riascos, S.H., N. Fernández, and H.A. García-Perdomo, *Effectiveness and risks of endoscopic management compared to vesicoureteral reimplantation in patients with high-grade vesicoureteral reflux: systematic review and network meta-analysis*. *Eur J Pediatr*, 2021. **180**(5): p. 1383-1391.
17. Xie, M., et al., *Do Various Treatment Modalities of Vesicoureteral Reflux Have Any Adverse Effects in Pediatric Patients? A Meta-Analysis*. *Urol Int*, 2021. **105**(11-12): p. 1002-1010.
18. Sterne, J.A.C., et al., *RoB 2: a revised tool for assessing risk of bias in randomised trials*. *Bmj*, 2019. **366**: p. l4898.
19. Shim, S.R., et al., *Network meta-analysis: application and practice using R software*. *Epidemiol Health*, 2019. **41**: p. e2019013.
20. Olbing, H., et al., *Renal scars and parenchymal thinning in children with vesicoureteral reflux: a 5-year report of the International Reflux Study in Children (European branch)*. *The Journal of urology*, 1992. **148**(5): p. 1653-1656.
21. Jodal, U., et al., *Ten-year results of randomized treatment of children with severe vesicoureteral reflux. Final report of the International Reflux Study in Children*. *Pediatric Nephrology*, 2006. **21**(6): p. 785-792.
22. Hari, P., et al., *Antibiotic prophylaxis in the management of vesicoureteric reflux: a randomized double-blind placebo-controlled trial*. *Pediatr Nephrol*, 2015. **30**(3): p. 479-86.
23. Craig, J.C., et al., *Antibiotic prophylaxis and recurrent urinary tract infection in children*. *New England Journal of Medicine*, 2009. **361**(18): p. 1748-1759.
24. Pennesi, M., et al., *Is antibiotic prophylaxis in children with vesicoureteral reflux effective in preventing pyelonephritis and renal scars? A randomized, controlled trial*. *Pediatrics*, 2008. **121**(6): p. e1489-94.
25. Weiss, R., et al., *Results of a randomized clinical trial of medical versus surgical management of infants and children with grades III and IV primary vesicoureteral reflux (United States)*. *The Journal of urology*, 1992. **148**(5 Part 2): p. 1667-1673.
26. Group, B.R.S., *Prospective trial of operative versus non-operative treatment of severe vesicoureteric reflux: two years' observation in 96 children*. *British Medical Journal (Clinical Research Edition)*, 1983: p. 171-174.

27. Garcia-Aparicio, L., et al., *Randomized clinical trial comparing endoscopic treatment with dextranomer hyaluronic acid copolymer and Cohen's ureteral reimplantation for vesicoureteral reflux: long-term results*. J Pediatr Urol, 2013. **9**(4): p. 483-7.
28. Capozza, N. and P. Caione, *Dextranomer/hyaluronic acid copolymer implantation for vesico-ureteral reflux: a randomized comparison with antibiotic prophylaxis*. J Pediatr, 2002. **140**(2): p. 230-4.
29. Brandström, P., et al., *The Swedish reflux trial: review of a randomized, controlled trial in children with dilating vesicoureteral reflux*. J Pediatr Urol, 2011. **7**(6): p. 594-600.
30. Salih, E.M., et al., *Comparison of Subureteral Endoscopic Injection of Dextranomer/Hyaluronic Acid and Lich-Gregoir Ureteral Reimplantation in the Treatment of Pediatric Primary Vesicoureteral Reflux: A Prospective Randomized Study*. J Laparoendosc Adv Surg Tech A, 2021. **31**(6): p. 719-723.
31. Estrada, C.R., Jr., et al., *Nomograms for predicting annual resolution rate of primary vesicoureteral reflux: results from 2,462 children*. J Urol, 2009. **182**(4): p. 1535-41.
32. Hajiyev, P. and B. Burgu, *Contemporary Management of Vesicoureteral Reflux*. Eur Urol Focus, 2017. **3**(2-3): p. 181-188.
33. Swerkersson, S., et al., *Urinary tract infection in small children: the evolution of renal damage over time*. Pediatr Nephrol, 2017. **32**(10): p. 1907-1913.
34. Elder, J.S. and M. Diaz, *Vesicoureteral reflux--the role of bladder and bowel dysfunction*. Nat Rev Urol, 2013. **10**(11): p. 640-8.
35. Mattoo, T.K., et al., *Renal scarring in the randomized intervention for children with vesicoureteral reflux (RIVUR) trial*. Clinical Journal of the American Society of Nephrology, 2016. **11**(1): p. 54-61.
36. Cheng, C.H., et al., *Antibiotic resistance patterns of community-acquired urinary tract infections in children with vesicoureteral reflux receiving prophylactic antibiotic therapy*. Pediatrics, 2008. **122**(6): p. 1212-7.
37. Austin, J.C. and C.S. Cooper, *Vesicoureteral reflux: surgical approaches*. Urol Clin North Am, 2004. **31**(3): p. 543-57, x.
38. Calisti, A., et al., *Endoscopic subureteral injection for vesicoureteral reflux and the risk of overtreatment*. Minerva Pediatr, 2009. **61**(1): p. 1-7.
39. Yap, T.L., et al., *STING versus HIT technique of endoscopic treatment for vesicoureteral reflux: A systematic review and meta-analysis*. J Pediatr Surg, 2016. **51**(12): p. 2015-2020.
40. Kirsch, A.J., C.S. Cooper, and G. Läckgren, *Non-Animal Stabilized Hyaluronic Acid/Dextranomer Gel (NASHA/Dx, Deflux) for Endoscopic Treatment of Vesicoureteral Reflux: What Have We Learned Over the Last 20 Years?* Urology, 2021. **157**: p. 15-28.
41. Finkelstein, J.B., et al., *How to decide which infant can have robotic surgery? Just do the math*. J Pediatr Urol, 2015. **11**(4): p. 170.e1-4.
42. Herz, D., et al., *Robot-assisted laparoscopic extravesical ureteral reimplant: A critical look at surgical outcomes*. J Pediatr Urol, 2016. **12**(6): p. 402.e1-402.e9.

## Acknowledgement

1  
2  
3 The authors would like to thank the team of Taipei Tzu Chi Hospital Library and the research  
4 team of Taipei Tzu Chi Hospital for their support in the database search and the development of  
5 this paper.  
6  
7  
8  
9

## 10 11 12 **Funding**

13  
14 This study was supported by a grant from the Taipei Tzu Chi Hospital, Buddhist Tzu Chi  
15 Medical Foundation (Grant No. TCRD-TPE-110-12)  
16  
17  
18  
19

## 20 21 22 **Author Contributions Statement**

23  
24 C.L Chang and C.H Chen conceptualized and designed the study, performed data  
25 collection, data analysis and drafted the original manuscript. S.D Yang, C.K Hsu, Y.C Tsai, and  
26 S.J. Chang coordinated and supervised data collection, and critically reviewed the manuscript.  
27  
28 All authors reviewed and approved the final manuscript as submitted and agree to be accountable  
29 for all aspects of the work.  
30  
31  
32  
33  
34  
35  
36

## 37 38 **Legends to The Figures**

39  
40 **Fig. 1** Research flow chart

41  
42 **Fig. 2(a)** Risk of bias graph: each risk of bias component displayed as percentage across papers

43  
44 **Fig. 2(b)** Risk of bias summary: each risk of bias component for each paper

45  
46  
47 **Fig. 3** Network graph of each treatment for UTI

48  
49 **Fig. 4** Comparison of UTI recurrence after each treatment of VUR

50  
51  
52 **Table 1** Study characteristics of included studies

53  
54 **Table 2** Results for pairwise comparisons of different treatment modalities  
55  
56  
57  
58  
59  
60

1  
2  
3  
4  
5 **Declarations**  
6

7  
8 **Ethics approval**  
9

10 This is a systematic review and network meta-analysis study. The Research Ethics Committee  
11 has confirmed that no ethical approval is required and there is no clinical trial registration.  
12  
13

14 **Conflict of interest**  
15

16 None.  
17  
18  
19  
20  
21  
22  
23  
24  
25  
26  
27  
28  
29  
30  
31  
32  
33  
34  
35  
36  
37  
38  
39  
40  
41  
42  
43  
44  
45  
46  
47  
48  
49  
50  
51  
52  
53  
54  
55  
56  
57  
58  
59  
60

1  
2  
3  
4  
5  
6  
7  
8  
9  
10  
11  
12  
13  
14  
15  
16  
17  
18  
19  
20  
21  
22  
23  
24  
25  
26  
27  
28  
29  
30  
31  
32  
33  
34  
35  
36  
37  
38  
39  
40  
41  
42  
43  
44  
45  
46  
47  
48  
49  
50  
51  
52  
53  
54  
55  
56  
57  
58  
59  
60

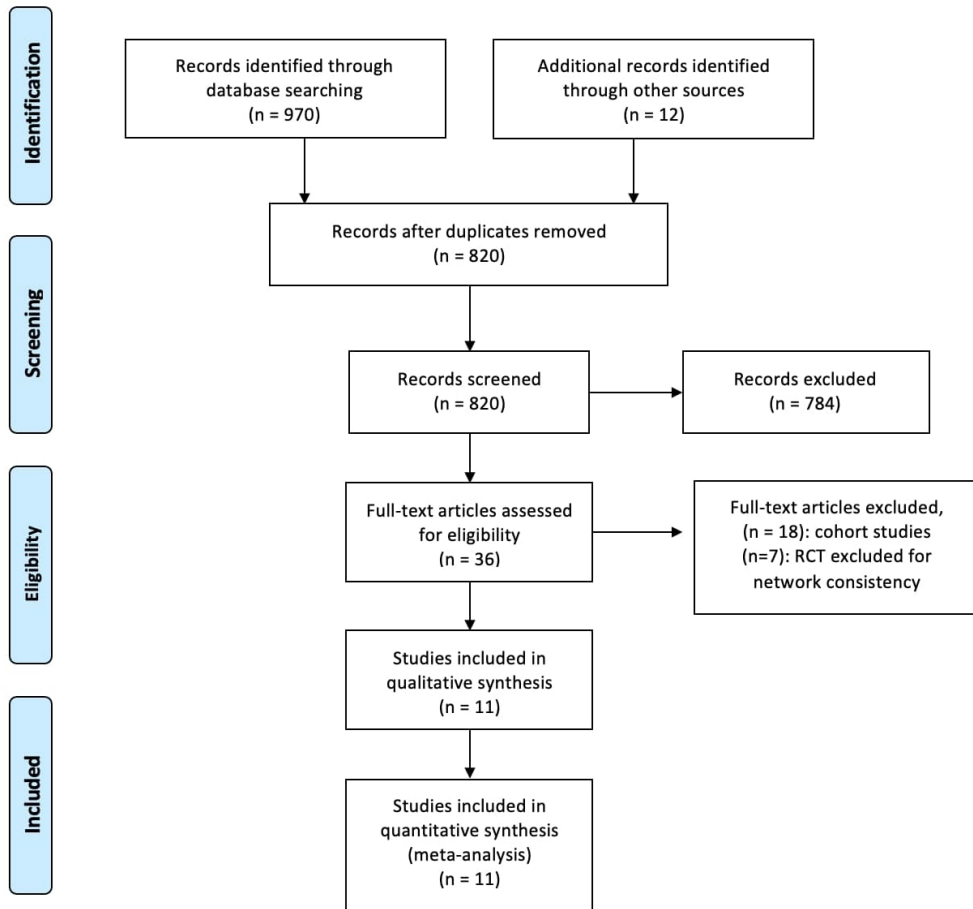

435x413mm (72 x 72 DPI)



1  
2  
3  
4  
5  
6  
7  
8  
9  
10  
11  
12  
13  
14  
15  
16  
17  
18  
19  
20  
21  
22  
23  
24  
25  
26  
27  
28  
29  
30  
31  
32  
33  
34  
35  
36  
37  
38  
39  
40  
41  
42  
43  
44  
45  
46  
47  
48  
49  
50  
51  
52  
53  
54  
55  
56  
57  
58  
59  
60

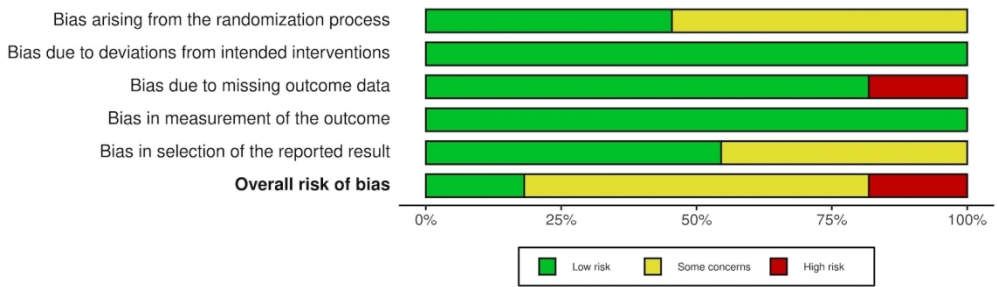

586x174mm (72 x 72 DPI)

1  
2  
3  
4  
5  
6  
7  
8  
9  
10  
11  
12  
13  
14  
15  
16  
17  
18  
19  
20  
21  
22  
23  
24  
25  
26  
27  
28  
29  
30  
31  
32  
33  
34  
35  
36  
37  
38  
39  
40  
41  
42  
43  
44  
45  
46  
47  
48  
49  
50  
51  
52  
53  
54  
55  
56  
57  
58  
59  
60

|       |                      | Risk of bias domains |    |    |    |    |         |
|-------|----------------------|----------------------|----|----|----|----|---------|
|       |                      | D1                   | D2 | D3 | D4 | D5 | Overall |
| Study | Hari 2015            | +                    | +  | +  | +  | +  | +       |
|       | Craig 2009           | +                    | +  | +  | +  | +  | +       |
|       | Pennesi 2008         | +                    | +  | +  | +  | -  | -       |
|       | Olbing 1992          | -                    | +  | X  | +  | +  | X       |
|       | Jodal 2006           | +                    | +  | X  | +  | +  | X       |
|       | Weiss 1992           | -                    | +  | +  | +  | +  | -       |
|       | BRSg 1983            | -                    | +  | +  | +  | -  | -       |
|       | Garcia-Aparicio 2013 | +                    | +  | +  | +  | -  | -       |
|       | Capozza 2002         | -                    | +  | +  | +  | +  | -       |
|       | Brandstrom 2011      | -                    | +  | +  | +  | -  | -       |
|       | Salih 2021           | -                    | +  | +  | +  | -  | -       |

Domains:  
 D1: Bias arising from the randomization process.  
 D2: Bias due to deviations from intended intervention.  
 D3: Bias due to missing outcome data.  
 D4: Bias in measurement of the outcome.  
 D5: Bias in selection of the reported result.

Judgement  
 High  
 Some concerns  
 Low

547x471mm (72 x 72 DPI)

1  
2  
3  
4  
5  
6  
7  
8  
9  
10  
11  
12  
13  
14  
15  
16  
17  
18  
19  
20  
21  
22  
23  
24  
25  
26  
27  
28  
29  
30  
31  
32  
33  
34  
35  
36  
37  
38  
39  
40  
41  
42  
43  
44  
45  
46  
47  
48  
49  
50  
51  
52  
53  
54  
55  
56  
57  
58  
59  
60

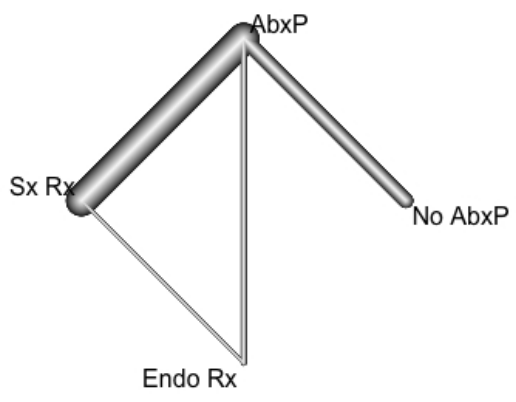

228x150mm (72 x 72 DPI)

1  
2  
3  
4  
5  
6  
7  
8  
9  
10  
11  
12  
13  
14  
15  
16  
17  
18  
19  
20  
21  
22  
23  
24  
25  
26  
27  
28  
29  
30  
31  
32  
33  
34  
35  
36  
37  
38  
39  
40  
41  
42  
43  
44  
45  
46  
47  
48  
49  
50  
51  
52  
53  
54  
55  
56  
57  
58  
59  
60

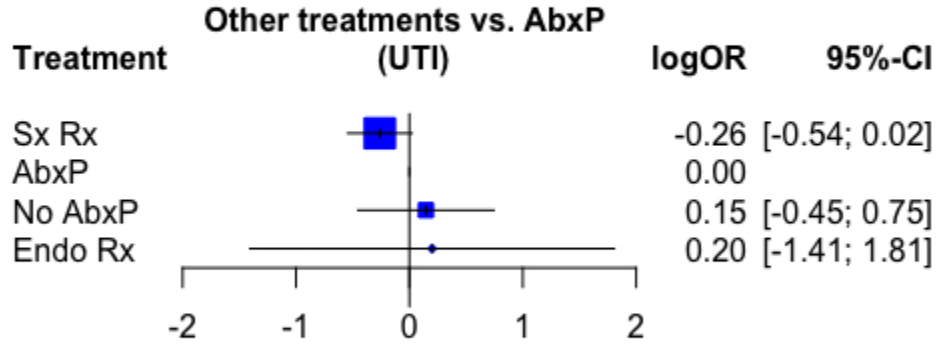

176x116mm (72 x 72 DPI)

| Author/year                 | Country   | VUR Grade                               | Age       | Follow up | UTI definition | Comparisons                |
|-----------------------------|-----------|-----------------------------------------|-----------|-----------|----------------|----------------------------|
| <b>Hari 2015</b>            | India     | VUR grade III, IV                       | <12 yrs   | 1 yr      | (+) UC         | AbxP vs no AbxP            |
| <b>Craig 2009</b>           | Australia | VUR grade III, IV                       | <18 yrs   | 1 yrs     | (+) UC         | AbxP vs no AbxP            |
| <b>Pennesi 2008</b>         | Italy     | VUR grade II, III, IV                   | <2.5 yrs  | 4 yrs     | Febrile UTI    | AbxP vs no AbxP            |
| <b>Olbing 1992</b>          | Germany   | VUR grade III, IV                       | <11 yrs   | 5 yrs     | No information | AbxP vs Sx Rx              |
| <b>Jodal 2006</b>           | US        | VUR grade III, IV                       | <11 yrs   | 5 yrs     | (+) UC         | AbxP vs Sx Rx              |
| <b>Weiss 1992</b>           | US        | VUR grade III, IV                       | < 10 yrs  | 4.5 yrs   | No information | AbxP vs Sx Rx              |
| <b>BRSg 1983</b>            | UK        | VUR grade III or grade II with scarring | >1 yr     | 2 yrs     | (+) UC         | Sx Rx vs AbxP              |
| <b>Garcia-Aparicio 2013</b> | Spain     | VUR grade II, III, IV                   | >1 yr     | 5 yrs     | No information | Endo Rx vs Sx Rx           |
| <b>Capozza 2002</b>         | Italy     | VUR grade II, III, IV                   | >1 yr     | 1 yr      | (+) UC         | Endo Rx vs AbxP            |
| <b>Brandstrom 2011</b>      | Sweden    | VUR grade III, IV                       | 1-2 yrs   | 2 yrs     | Febrile UTI    | Endo Rx vs AbxP vs no AbxP |
| <b>Salih 2021</b>           | Egypt     | VUR grade III, IV                       | 1- 10 yrs | 2 yrs     | No information | Endo Rx vs Sx Rx           |

**Table (1) Study characteristics of included studies**

*VUR: vesicoureteral reflux, UC: urine culture, UTI: urinary tract infection, AbxP: antibiotic prophylaxis, Sx Rx: surgical treatment, Endo Rx: endoscopic treatment*

**Table (2) Results for pairwise comparisons of different treatment modalities**

| Outcomes                        | Treatment comparisons<br>Treatment (1) vs (2) | Treatment (1)<br>Total E/C (n/n) | Treatment (2)<br>Total E/C (n/n) | OR (95%CI)          |
|---------------------------------|-----------------------------------------------|----------------------------------|----------------------------------|---------------------|
| UTI                             | Sx Rx vs AbxP                                 | 50/238                           | 63/235                           | 0.75(0.43,1.29)     |
|                                 | Endo Rx vs AbxP                               | 20/105                           | 10/90                            | 2.03(0.89,4.64)     |
|                                 | AbxP vs No AbxP                               | 26/152                           | 24/145                           | 1.07(0.51,2.24)     |
|                                 | Endo Rx vs Sx Rx                              | 2/22                             | 0/19                             | 4.76(0.21,105.47)   |
| Progression of<br>old lesions   | AbxP vs Sx Rx                                 | 52/270                           | 43/264                           | 1.23(0.79,1.93)     |
|                                 | AbxP vs No AbxP                               | 1/50                             | 9/50                             | 0.09(0.01,0.76)     |
| Formation of<br>new renal scars | AbxP vs Sx Rx                                 | 33/223                           | 36/215                           | 0.86(0.51,1.44)     |
|                                 | AbxP vs No AbxP                               | 0/69                             | 9/68                             | 0.05(0,0.79)        |
|                                 | AbxP vs Endo Rx                               | 0/69                             | 6/66                             | 0.07(0,1.21)        |
|                                 | Endo Rx vs No AbxP                            | 6/66                             | 9/68                             | 0.66(0.22,1.96)     |
| RRU                             | Sx Rx vs Endo Rx                              | 77/80                            | 66/80                            | 5.02(1.47,17.13)    |
|                                 | Sx Rx vs AbxP                                 | 67/69                            | 17/65                            | 94.59(20.87,428.74) |
|                                 | Endo Rx vs AbxP                               | 40/52                            | 10/30                            | 8.33(3.14,22.13)    |

*E/C: events/cases, OR: odd ratio, UTI: urinary tract infection, Sx Rx: surgical treatment, AbxP: antibiotic prophylaxis, Endo Rx: endoscopic treatment, RRU: resolution by renal units*

PRISMA NMA Checklist of Items to Include When Reporting A Systematic Review Involving a Network Meta-analysis

| Section/Topic             | Item # | Checklist Item                                                                                                                                                                                                                                                                                                                                                                                                                                                                                                                                                                                                                                                                                                                                                                          | Reported on Page # |
|---------------------------|--------|-----------------------------------------------------------------------------------------------------------------------------------------------------------------------------------------------------------------------------------------------------------------------------------------------------------------------------------------------------------------------------------------------------------------------------------------------------------------------------------------------------------------------------------------------------------------------------------------------------------------------------------------------------------------------------------------------------------------------------------------------------------------------------------------|--------------------|
| <b>TITLE</b>              |        |                                                                                                                                                                                                                                                                                                                                                                                                                                                                                                                                                                                                                                                                                                                                                                                         |                    |
| Title                     | 1      | Identify the report as a systematic review <i>incorporating a network meta-analysis (or related form of meta-analysis)</i> .                                                                                                                                                                                                                                                                                                                                                                                                                                                                                                                                                                                                                                                            | 1                  |
| <b>ABSTRACT</b>           |        |                                                                                                                                                                                                                                                                                                                                                                                                                                                                                                                                                                                                                                                                                                                                                                                         |                    |
| Structured summary        | 2      | Provide a structured summary including, as applicable:<br><b>Background:</b> main objectives<br><b>Methods:</b> data sources; study eligibility criteria, participants, and interventions; study appraisal; and <i>synthesis methods, such as network meta-analysis</i> .<br><b>Results:</b> number of studies and participants identified; summary estimates with corresponding confidence/credible intervals; <i>treatment rankings may also be discussed. Authors may choose to summarize pairwise comparisons against a chosen treatment included in their analyses for brevity.</i><br><b>Discussion/Conclusions:</b> limitations; conclusions and implications of findings.<br><b>Other:</b> primary source of funding; systematic review registration number with registry name. | 1                  |
| <b>INTRODUCTION</b>       |        |                                                                                                                                                                                                                                                                                                                                                                                                                                                                                                                                                                                                                                                                                                                                                                                         |                    |
| Rationale                 | 3      | Describe the rationale for the review in the context of what is already known, <i>including mention of why a network meta-analysis has been conducted</i> .                                                                                                                                                                                                                                                                                                                                                                                                                                                                                                                                                                                                                             | 2-3                |
| Objectives                | 4      | Provide an explicit statement of questions being addressed, with reference to participants, interventions, comparisons, outcomes, and study design (PICOS).                                                                                                                                                                                                                                                                                                                                                                                                                                                                                                                                                                                                                             | 2-3                |
| <b>METHODS</b>            |        |                                                                                                                                                                                                                                                                                                                                                                                                                                                                                                                                                                                                                                                                                                                                                                                         |                    |
| Protocol and registration | 5      | Indicate whether a review protocol exists and if and where it can be accessed (e.g., Web address); and, if available, provide registration information, including registration number.                                                                                                                                                                                                                                                                                                                                                                                                                                                                                                                                                                                                  | -                  |
| Eligibility criteria      | 6      | Specify study characteristics (e.g., PICOS, length of follow-up) and report characteristics (e.g., years considered, language, publication status) used as criteria for eligibility, giving rationale. <i>Clearly describe eligible treatments included in the treatment network, and note whether any have been clustered or merged into the same node (with justification)</i> .                                                                                                                                                                                                                                                                                                                                                                                                      | 4                  |
| Information sources       | 7      | Describe all information sources (e.g., databases with dates of coverage, contact with study authors to identify additional studies) in the search and date last searched.                                                                                                                                                                                                                                                                                                                                                                                                                                                                                                                                                                                                              | 4                  |
| Search                    | 8      | Present full electronic search strategy for at least one database, including any limits used, such that it could be repeated.                                                                                                                                                                                                                                                                                                                                                                                                                                                                                                                                                                                                                                                           | 4                  |
| Study selection           | 9      | State the process for selecting studies (i.e., screening, eligibility, included in systematic review, and, if applicable,                                                                                                                                                                                                                                                                                                                                                                                                                                                                                                                                                                                                                                                               | 4                  |

|                                        |           |                                                                                                                                                                                                                                                                                                                                                                                                                                                   |     |
|----------------------------------------|-----------|---------------------------------------------------------------------------------------------------------------------------------------------------------------------------------------------------------------------------------------------------------------------------------------------------------------------------------------------------------------------------------------------------------------------------------------------------|-----|
|                                        |           | included in the meta-analysis).                                                                                                                                                                                                                                                                                                                                                                                                                   |     |
| Data collection process                | 10        | Describe method of data extraction from reports (e.g., piloted forms, independently, in duplicate) and any processes for obtaining and confirming data from investigators.                                                                                                                                                                                                                                                                        | 4   |
| Data items                             | 11        | List and define all variables for which data were sought (e.g., PICOS, funding sources) and any assumptions and simplifications made.                                                                                                                                                                                                                                                                                                             | 5   |
| <b>Geometry of the network</b>         | <b>S1</b> | Describe methods used to explore the geometry of the treatment network under study and potential biases related to it. This should include how the evidence base has been graphically summarized for presentation, and what characteristics were compiled and used to describe the evidence base to readers.                                                                                                                                      | 5   |
| Risk of bias within individual studies | 12        | Describe methods used for assessing risk of bias of individual studies (including specification of whether this was done at the study or outcome level), and how this information is to be used in any data synthesis.                                                                                                                                                                                                                            | 5   |
| Summary measures                       | 13        | State the principal summary measures (e.g., risk ratio, difference in means). <i>Also describe the use of additional summary measures assessed, such as treatment rankings and surface under the cumulative ranking curve (SUCRA) values, as well as modified approaches used to present summary findings from meta-analyses.</i>                                                                                                                 | 6   |
| Planned methods of analysis            | 14        | Describe the methods of handling data and combining results of studies for each network meta-analysis. This should include, but not be limited to: <ul style="list-style-type: none"> <li>• <i>Handling of multi-arm trials;</i></li> <li>• <i>Selection of variance structure;</i></li> <li>• <i>Selection of prior distributions in Bayesian analyses; and</i></li> <li>• <i>Assessment of model fit.</i></li> </ul>                            | 6   |
| <b>Assessment of Inconsistency</b>     | <b>S2</b> | Describe the statistical methods used to evaluate the agreement of direct and indirect evidence in the treatment network(s) studied. Describe efforts taken to address its presence when found.                                                                                                                                                                                                                                                   | 6   |
| Risk of bias across studies            | 15        | Specify any assessment of risk of bias that may affect the cumulative evidence (e.g., publication bias, selective reporting within studies).                                                                                                                                                                                                                                                                                                      | 5-6 |
| Additional analyses                    | 16        | Describe methods of additional analyses if done, indicating which were pre-specified. This may include, but not be limited to, the following: <ul style="list-style-type: none"> <li>• Sensitivity or subgroup analyses;</li> <li>• Meta-regression analyses;</li> <li>• <i>Alternative formulations of the treatment network; and</i></li> <li>• <i>Use of alternative prior distributions for Bayesian analyses (if applicable).</i></li> </ul> | -   |



## RESULTS†

|                                          |           |                                                                                                                                                                                                                                                                                                                                                                                                                                                              |              |
|------------------------------------------|-----------|--------------------------------------------------------------------------------------------------------------------------------------------------------------------------------------------------------------------------------------------------------------------------------------------------------------------------------------------------------------------------------------------------------------------------------------------------------------|--------------|
| Study selection                          | 17        | Give numbers of studies screened, assessed for eligibility, and included in the review, with reasons for exclusions at each stage, ideally with a flow diagram.                                                                                                                                                                                                                                                                                              | 6            |
| <b>Presentation of network structure</b> | <b>S3</b> | Provide a network graph of the included studies to enable visualization of the geometry of the treatment network.                                                                                                                                                                                                                                                                                                                                            | <b>Fig 3</b> |
| <b>Summary of network geometry</b>       | <b>S4</b> | Provide a brief overview of characteristics of the treatment network. This may include commentary on the abundance of trials and randomized patients for the different interventions and pairwise comparisons in the network, gaps of evidence in the treatment network, and potential biases reflected by the network structure.                                                                                                                            | 7            |
| Study characteristics                    | 18        | For each study, present characteristics for which data were extracted (e.g., study size, PICOS, follow-up period) and provide the citations.                                                                                                                                                                                                                                                                                                                 | 6            |
| Risk of bias within studies              | 19        | Present data on risk of bias of each study and, if available, any outcome level assessment.                                                                                                                                                                                                                                                                                                                                                                  | 7            |
| Results of individual studies            | 20        | For all outcomes considered (benefits or harms), present, for each study: 1) simple summary data for each intervention group, and 2) effect estimates and confidence intervals. <i>Modified approaches may be needed to deal with information from larger networks.</i>                                                                                                                                                                                      | -            |
| Synthesis of results                     | 21        | Present results of each meta-analysis done, including confidence/credible intervals. <i>In larger networks, authors may focus on comparisons versus a particular comparator (e.g. placebo or standard care), with full findings presented in an appendix. League tables and forest plots may be considered to summarize pairwise comparisons.</i> If additional summary measures were explored (such as treatment rankings), these should also be presented. | 7-9          |
| <b>Exploration for inconsistency</b>     | <b>S5</b> | Describe results from investigations of inconsistency. This may include such information as measures of model fit to compare consistency and inconsistency models, <i>P</i> values from statistical tests, or summary of inconsistency estimates from different parts of the treatment network.                                                                                                                                                              | 7            |
| Risk of bias across studies              | 22        | Present results of any assessment of risk of bias across studies for the evidence base being studied.                                                                                                                                                                                                                                                                                                                                                        | 9            |
| Results of additional analyses           | 23        | Give results of additional analyses, if done (e.g., sensitivity or subgroup analyses, meta-regression analyses, <i>alternative network geometries studied, alternative choice of prior distributions for Bayesian analyses, and so forth</i> ).                                                                                                                                                                                                              | -            |
| <b>DISCUSSION</b>                        |           |                                                                                                                                                                                                                                                                                                                                                                                                                                                              |              |
| Summary of evidence                      | 24        | Summarize the main findings, including the strength of evidence for each main outcome; consider their relevance to key groups (e.g., healthcare providers, users, and policy-makers).                                                                                                                                                                                                                                                                        | 10           |
| Limitations                              | 25        | Discuss limitations at study and outcome level (e.g., risk of bias), and at review level (e.g., incomplete retrieval of identified research, reporting bias). <i>Comment on the validity of the assumptions, such as transitivity and consistency.</i> Comment                                                                                                                                                                                               | 12           |

|    |                |                                                                    |                                                                    |
|----|----------------|--------------------------------------------------------------------|--------------------------------------------------------------------|
| 1  |                | <i>on any concerns regarding network geometry (e.g., avoidance</i> |                                                                    |
| 2  |                | <i>of certain comparisons).</i>                                    |                                                                    |
| 3  |                |                                                                    |                                                                    |
| 4  | Conclusions    | 26                                                                 | Provide a general interpretation of the results in the context of  |
| 5  |                |                                                                    | other evidence, and implications for future research.              |
| 6  |                |                                                                    |                                                                    |
| 7  | <b>FUNDING</b> |                                                                    |                                                                    |
| 8  | Funding        | 27                                                                 | Describe sources of funding for the systematic review and other    |
| 9  |                |                                                                    | support (e.g., supply of data); role of funders for the systematic |
| 10 |                |                                                                    | review. This should also include information regarding whether     |
| 11 |                |                                                                    | funding has been received from manufacturers of treatments in      |
| 12 |                |                                                                    | the network and/or whether some of the authors are content         |
| 13 |                |                                                                    | experts with professional conflicts of interest that could affect  |
| 14 |                |                                                                    | use of treatments in the network.                                  |
| 15 |                |                                                                    |                                                                    |
| 16 |                |                                                                    |                                                                    |

PICOS = population, intervention, comparators, outcomes, study design.

\* Text in italics indicates wording specific to reporting of network meta-analyses that has been added to guidance from the PRISMA statement.

† Authors may wish to plan for use of appendices to present all relevant information in full detail for items in this section.

### **Box. Terminology: Reviews With Networks of Multiple Treatments**

Different terms have been used to identify systematic reviews that incorporate a network of multiple treatment comparisons. A brief overview of common terms follows.

*Indirect treatment comparison:* Comparison of 2 interventions for which studies against a common comparator, such as placebo or a standard treatment, are available (i.e., indirect information). The direct treatment effects of each intervention against the common comparator (i.e., treatment effects from a comparison of interventions made within a study) may be used to estimate an indirect treatment comparison between the 2 interventions (**Appendix Figure 1, A**). An indirect treatment comparison (ITC) may also involve multiple links. For example, in **Appendix Figure 1, B**, treatments B and D may be compared indirectly on the basis of studies encompassing comparisons of B versus C, A versus C, and A versus D.

*Network meta-analysis or mixed treatment comparison:* These terms, which are often used interchangeably, refer to situations involving the simultaneous comparison of 3 or more interventions. Any network of treatments consisting of strictly unclosed loops can be thought of as a series of ITCs (**Appendix Figure 1, A and B**). In mixed treatment comparisons, both direct and indirect information is available to inform the effect size estimates for at least some of the comparisons; visually, this is shown by closed loops in a network graph (**Appendix Figure 1, C**). Closed loops are not required to be present for every comparison under study. "Network meta-analysis" is an inclusive term that incorporates the scenarios of both indirect and mixed treatment comparisons.

*Network geometry evaluation:* The description of characteristics of the network of interventions, which may include use of numerical summary statistics. This does not involve quantitative synthesis to compare treatments. This evaluation describes the current evidence available for the competing interventions to identify gaps and potential bias. Network geometry is described further in **Appendix Box 4**.

### **Appendix Box 1. The Assumption of Transitivity for Network Meta-Analysis**

Methods for indirect treatment comparisons and network meta-analysis enable learning about the relative treatment effects of, for example, treatments A and B through use of studies where these interventions are compared against a common therapy, C.

When planning a network meta-analysis, it is important to assess patient and study characteristics across the studies that compare pairs of treatments. These characteristics are commonly referred to as *effect modifiers* and include traits such as average patient age, gender distribution, disease severity, and a wide range of other plausible features.

For network meta-analysis to produce valid results, it is important that the distribution of effect modifiers is similar, for example, across studies of A versus B and A versus C. This balance increases the plausibility of reliable findings from an indirect comparison of B versus C through the common comparator A. When this balance is present, the assumption of transitivity can be judged to hold.

Authors of network meta-analyses should present systematic (and even tabulated) information regarding patient and study characteristics whenever available. This information helps readers to empirically evaluate the validity of the assumption of transitivity by reviewing the distribution of potential effect modifiers across trials.

For Review Only

**Appendix Box 2. Differences in Approach to Fitting Network Meta-Analyses**

Network meta-analysis can be performed within either a frequentist or a Bayesian framework. Frequentist and Bayesian approaches to statistics differ in their definitions of probability. Thus far, the majority of published network meta-analyses have used a Bayesian approach.

Bayesian analyses return the posterior probability distribution of all the model parameters given the data and prior beliefs (e.g., from external information) about the values of the parameters. They fully encapsulate the uncertainty in the parameter of interest and thus can make direct probability statements about these parameters (e.g., the probability that one intervention is superior to another).

Frequentist analyses calculate the probability that the observed data would have occurred under their sampling distribution for hypothesized values of the parameters. This approach to parameter estimation is more indirect than the Bayesian approach.

Bayesian methods have been criticized for their perceived complexity and the potential for subjectivity to be introduced by choice of a prior distribution that may affect study findings. Others argue that explicit use of a prior distribution makes transparent how individuals can interpret the same data differently. Despite these challenges, Bayesian methods offer considerable flexibility for statistical modeling. In-depth introductions to Bayesian methods and discussion of these and other issues can be found elsewhere.

Or Review Only

### **Appendix Box 3. Network Meta-Analysis and Assessment of Consistency**

Network meta-analysis often involves the combination of direct and indirect evidence. In the simplest case, we wish to compare treatments A and B and have 2 sources of information: direct evidence via studies comparing A versus B, and indirect evidence via groups of studies comparing A and B with a common intervention, C. Together, this evidence forms a closed loop, ABC.

Direct and indirect evidence for a comparison of interventions should be combined only when their findings are similar in magnitude and interpretation. For example, for a comparison of mortality rates between A and B, an odds ratio determined from studies of A versus B should be similar to the odds ratio comparing A versus B estimated indirectly based on studies of A versus C and B versus C. This assumption of comparability of direct and indirect evidence is referred to as *consistency* of treatment effects.

When a treatment network contains a closed loop of interventions, it is possible to examine statistically whether there is agreement between the direct and indirect estimates of intervention effect.

Different methods to evaluate potential differences in relative treatment effects estimated by direct and indirect comparisons are grouped as *local approaches* and *global approaches*. Local approaches (e.g., the Bucher method or the node-splitting method) assess the presence of inconsistency for a particular pairwise comparison in the network, whereas global approaches (e.g., inconsistency models,  $I^2$  measure for inconsistency) consider the potential for inconsistency in the network as a whole.

Tests for inconsistency can have limited power to detect a true difference between direct and indirect evidence. When multiple loops are being tested for inconsistency, one or a few may show inconsistency simply by chance. Further discussions of consistency and related concepts are available elsewhere.

Inconsistency in a treatment network can indicate lack of transitivity (see **Appendix Box 1**).

#### **Appendix Box 4. Network Geometry and Considerations for Bias**

The term *network geometry* is used to refer to the architecture of the treatment comparisons that have been made for the condition under study. This includes what treatments are involved in the comparisons in a network, in what abundance they are present, the respective numbers of patients randomly assigned to each treatment, and whether particular treatments and comparisons may have been preferred or avoided.

Networks may take on different shapes. Poorly connected networks depend extensively on indirect comparisons. Meta-analyses of such networks may be less reliable than those from networks where most treatments have been compared against each other.

Qualitative description of network geometry should be provided and accompanied by a network graph. Quantitative metrics assessing features of network geometry, such as *diversity* (related to the number of treatments assessed and the balance of evidence among them), *co-occurrence* (related to whether comparisons between certain treatments are more or less common), and *homophily* (related to the extent of comparisons between treatments in the same class versus competing classes), can also be mentioned.

Although common, established steps for reviewing network geometry do not yet exist, however examples of in-depth evaluations have been described related to treatments for tropical diseases and basal cell carcinoma and may be of interest to readers. An example based on 75 trials of treatments for pulmonary arterial hypertension (**Appendix Figure 3**) suggests that head-to-head studies of active therapies may prove useful to further strengthen confidence in interpretation of summary estimates of treatment comparisons.

Review Only

### **Appendix Box 5. Probabilities and Rankings in Network Meta-Analysis**

Systematic reviews incorporating network meta-analyses can provide information about the hierarchy of competing interventions in terms of treatment rankings.

The term *treatment ranking probabilities* refers to the probabilities estimated for each treatment in a network of achieving a particular placement in an ordering of treatment effects from best to worst. A network of 10 treatments provides a total of 100 ranking probabilities—that is, for each intervention, the chance of being ranked first, second, third, fourth, fifth, and so forth).

Several techniques are feasible to summarize relative rankings, and include graphical tools as well as different approaches for estimating ranking probabilities. **Appendix Figure 6** shows 2 approaches to presenting such information, on the basis of a comparison of adjuvant interventions for resected pancreatic adenocarcinoma.

Robust reporting of rankings also includes specifying median ranks with uncertainty intervals, cumulative probability curves, and the surface under the cumulative ranking (SUCRA) curve.

Rankings can be reported along with corresponding estimates of pairwise comparisons between interventions. Rankings should be reported with probability estimates to minimize misinterpretation from focusing too much on the most likely rank.

Rankings may exaggerate small differences in relative effects, especially if they are based on limited information. An objective assessment of the strength of information in the network and the magnitude of absolute benefits should accompany rankings to minimize potential biases.

Review Only



1  
2  
3  
4  
5  
6  
7  
8  
9  
10  
11  
12  
13  
14  
15  
16  
17  
18  
19  
20  
21  
22  
23  
24  
25  
26  
27  
28  
29  
30  
31  
32  
33  
34  
35  
36  
37  
38  
39  
40  
41  
42  
43  
44  
45  
46  
47  
48  
49  
50  
51  
52  
53  
54  
55  
56  
57  
58  
59  
60

**Appendix Figure 1A-1C**

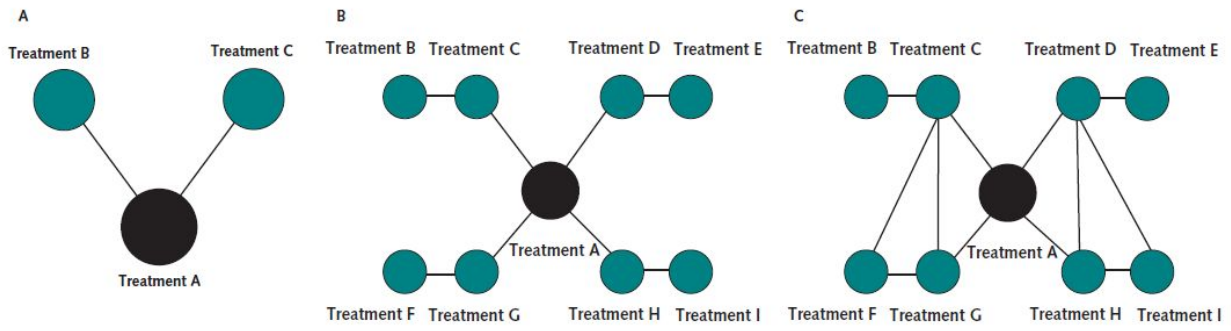

**Appendix Figure 3**

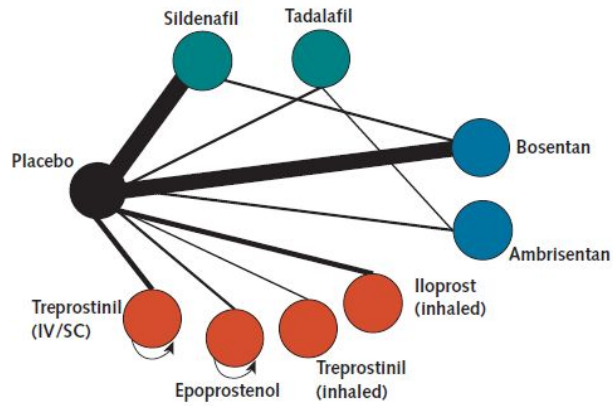

**Appendix Figure 6**

| Ranking | Treatment and Coresponding Ranking Probabilities<br>Grade 3 or 4 Hematologic Toxicity |             |                          |                                 |
|---------|---------------------------------------------------------------------------------------|-------------|--------------------------|---------------------------------|
|         | 5-FU                                                                                  | Gemcitabine | Chemoradiation<br>+ 5-FU | Chemoradiation<br>+ gemcitabine |
| 1       | 0.42                                                                                  | 0.42        | 0.15                     | 0.01                            |
| 2       | 0.46                                                                                  | 0.36        | 0.15                     | 0.02                            |
| 3       | 0.10                                                                                  | 0.17        | 0.68                     | 0.04                            |
| 4       | 0.02                                                                                  | 0.05        | 0.02                     | 0.93                            |

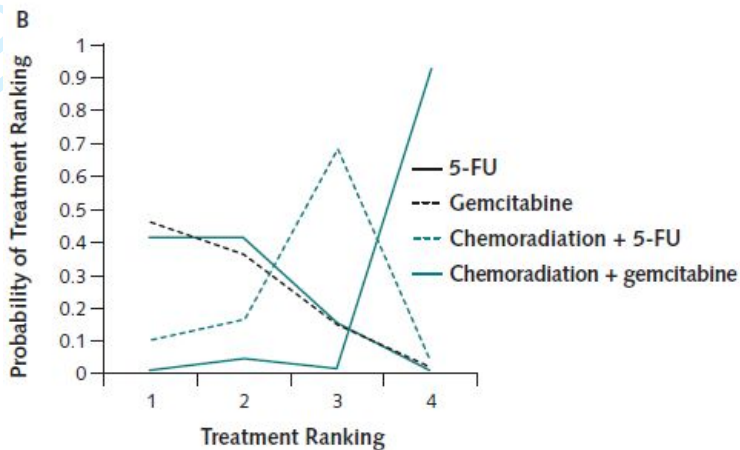

# BMJ Paediatrics Open

## Effectiveness of Various Treatment Modalities in Children with Vesicoureteral Reflux Grade II to IV: A Systematic Review and Network Meta-analysis

|                               |                                                                                                                                                                                                                                                                                                                            |
|-------------------------------|----------------------------------------------------------------------------------------------------------------------------------------------------------------------------------------------------------------------------------------------------------------------------------------------------------------------------|
| Journal:                      | <i>BMJ Paediatrics Open</i>                                                                                                                                                                                                                                                                                                |
| Manuscript ID                 | bmjpo-2023-002096.R1                                                                                                                                                                                                                                                                                                       |
| Article Type:                 | Original research                                                                                                                                                                                                                                                                                                          |
| Date Submitted by the Author: | 21-Jul-2023                                                                                                                                                                                                                                                                                                                |
| Complete List of Authors:     | Chang, Chia-Lun; Taipei Tzu Chi General Hospital<br>Chen, Chun-Hua; Taipei municipal Wanfang hospital, Taipei, Taiwan.<br>Hsu, Chun-Kai; Taipei Tzu Chi General Hospital<br>Yang, Stephen S.; Taipei Tzu Chi General Hospital<br>chang, shang-jen; National Taiwan University Hospital, ; Taipei Tzu Chi General Hospital, |
| Keywords:                     | Statistics, Nephrology                                                                                                                                                                                                                                                                                                     |
|                               |                                                                                                                                                                                                                                                                                                                            |

SCHOLARONE™  
Manuscripts

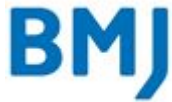

I, the Submitting Author has the right to grant and does grant on behalf of all authors of the Work (as defined in the below author licence), an exclusive licence and/or a non-exclusive licence for contributions from authors who are: i) UK Crown employees; ii) where BMJ has agreed a CC-BY licence shall apply, and/or iii) in accordance with the terms applicable for US Federal Government officers or employees acting as part of their official duties; on a worldwide, perpetual, irrevocable, royalty-free basis to BMJ Publishing Group Ltd ("BMJ") its licensees and where the relevant Journal is co-owned by BMJ to the co-owners of the Journal, to publish the Work in this journal and any other BMJ products and to exploit all rights, as set out in our [licence](#).

The Submitting Author accepts and understands that any supply made under these terms is made by BMJ to the Submitting Author unless you are acting as an employee on behalf of your employer or a postgraduate student of an affiliated institution which is paying any applicable article publishing charge ("APC") for Open Access articles. Where the Submitting Author wishes to make the Work available on an Open Access basis (and intends to pay the relevant APC), the terms of reuse of such Open Access shall be governed by a Creative Commons licence – details of these licences and which [Creative Commons](#) licence will apply to this Work are set out in our licence referred to above.

Other than as permitted in any relevant BMJ Author's Self Archiving Policies, I confirm this Work has not been accepted for publication elsewhere, is not being considered for publication elsewhere and does not duplicate material already published. I confirm all authors consent to publication of this Work and authorise the granting of this licence.

1  
2  
3  
4 **Effectiveness of Various Treatment Modalities in Children with Vesicoureteral Reflux Grade II to IV: A Systematic**  
5  
6 **Review and Network Meta-analysis**  
7

8  
9 Chia-Lun Chang<sup>1,2</sup>, Stephen Shei-Dei Yang<sup>1,2</sup>, Chun-Kai Hsu<sup>1,2</sup>, Chun-Hua Chen<sup>3</sup>, Shang-Jen Chang<sup>4</sup>

- 10  
11 1. Department of Urology, Taipei Tzu Chi Hospital, Buddhist Tzu Chi Medical Foundation, New Taipei City, 231, Taiwan.  
12  
13 2. Department of Urology, School of Medicine, Tzu Chi University, Hualien, 970, Taiwan.  
14  
15 3. Department of Neurology, Taipei municipal Wanfang hospital, Taipei, Taiwan.  
16  
17 4. Department of Urology, National Taiwan University Hospital, Taipei, Taiwan  
18  
19

20  
21 Address correspondence and reprint requests to: Shang-Jen Chang

22  
23 Department of Urology, National Taiwan University Hospital, Taipei, Taiwan

24  
25 Tel: +886-2-23123456

26  
27 Fax: +886-2-23123456

28  
29 E-mail: [krissygnet@gmail.com](mailto:krissygnet@gmail.com)

30  
31 Address: No.7, Chung Shan S. Rd. ( Zhongshan S. Rd. ) , Zhongzheng Dist., Taipei City, 100225  
32  
33  
34

35  
36 Competing interest

37  
38 None.  
39  
40  
41  
42  
43  
44  
45  
46  
47

### Author Contributions Statement

C.L Chang and C.H Chen conceptualized and designed the study, performed data collection, data analysis and drafted the original manuscript. C.K Hsu, S.D Yang and S.J. Chang coordinated and supervised data collection, and critically reviewed the manuscript. All authors reviewed and approved the final manuscript as submitted and agree to be accountable for all aspects of the work.

**What is already known on this topic** – reimplantation surgery provides a significantly better reflux resolution in children with vesicoureteral reflux

**What this study adds** – There are no significant differences in UTI recurrence rate, renal scar progressions and new renal scar formation in VUR grades II-IV between antibiotic prophylaxis, endoscopic surgery and reimplantation surgery.

**How this study might affect research, practice or policy** – The choice of treatment should be individualized and risk-based approach. Physicians' and parents' preference should be also considered because of no significant differences between antibiotic prophylaxis, endoscopic surgery and reimplantation surgery in preventing UTI recurrence and renal scarring.

**ABSTRACT**

Vesicoureteral reflux (VUR) is one of the most common risk factors of urinary tract infection (UTI) among children. Various treatment modalities including antibiotic prophylaxis, surgical or endoscopic corrections, and conservative treatment were used depending on the severity of VUR. The aim of this study is to compare the effectiveness of these treatment modalities in patients with VUR grades II-IV by conducting a systematic review and network meta-analysis. A systematic search from different databases was performed from their earliest records to December 2022 without any language restriction. Only randomized control trials were included in this study. Effectiveness of treatment modalities were mainly compared by UTI. Other outcomes for renal scarring and resolution by renal units were also measured between treatments. A total of 11 studies with 1447 children were included in this study. While comparing with antibiotic prophylaxis in network meta-analysis for UTI recurrence, surgical treatment probably lowers the rate of UTI recurrence (Log OR -0.26, 95%CI -0.54 to 0.02, high quality). However, endoscopic treatment (Log OR 0.2, 95%CI -1.41 to 1.81, high quality) and conservative treatment (Log OR 0.15, 95%CI -0.45 to 0.75, high quality) revealed probably inferior to antibiotic treatment. Surgical treatment was found to be more effective than other treatment options for resolving VUR. However, there was no significant difference between the treatments in terms of their impact on UTI recurrence, progression of previous renal scars, or formation of new renal scars. These findings provide evidence-based suggestions for the choice of treatment, which should be individualized and based on the patient's risk factors.

## Introduction

Primary vesicoureteral reflux (VUR), the reflux of urine into the ureter or the kidney due to anti-reflux failure in vesicoureteral junction[1], is a common risk factor of urinary tract infection (UTI) among children. The incidence of VUR among normal children is 0.5 to 3%.[2] However, in those with UTI combined with VUR, the incidence rises to 30 to 40%.[3, 4] It is also a potential risk factor for various renal problems like pyelonephritis, renal scarring, and chronic kidney disease.[5]

The grading of VUR is mostly defined by the use of radiographic classification based on the degree of filling and dilatation of the ureter, renal pelvis, and calyces by the International Reflux Study group.[6] Voiding cystourethrogram (VCUG) is the gold standard for diagnosing VUR and defining its severity. The severity of VUR can also be easily assessed with distal ureter diameter ratio and VUR index score which can also predict for resolution.[7-9]

Spontaneous resolution of VUR can be observed in about more than 80% of grades I and II, around 45% of grade III, and less than 10% of grades IV and V.[10] Various treatment modalities including antibiotic prophylaxis (AbxP), surgical (Sx Rx) or endoscopic corrections (Endo Rx), and conservative treatment without antibiotic prophylaxis (no AbxP) are used depending on the severity of VUR and physicians' preference.[11] Each treatment's effectiveness varies in preventing UTI and renal damage. Success rate also differs in each surgical correction method.[12, 13] With good resolution rates, nonoperative management, such



1  
2  
3  
4 as AbxP and no AbxP, are preferred treatments for low grade VUR. However, Sx Rx is reserved for high grade VUR due to a  
5  
6 potential risk of renal damage.[14]  
7

8  
9  
10 Previous meta-analytic studies[15-17] examined treatments mostly for low grade (I, II) and high grade (III, IV, V). However, in  
11  
12 practice, children with grade V VUR is associated with a very high risk of recurrent UTI and renal scarring, and therefore, AbxP  
13  
14 alone may not be sufficient for these patients and rarely enrolled in randomized controlled study. On the contrary, surgery is  
15  
16 rarely used to treat grade I VUR patients. Having the high probability of rapid spontaneous resolution in VUR grade I, and  
17  
18 concerning the high incidence of associated renal dysplasia or potential risk of renal damage in VUR grade V, the choice of  
19  
20 treatment for these two grades is clear and more standardized. Therefore, most randomized control trials (RCTs) comparing  
21  
22 AbxP, Endo Rx, or reimplantation include VUR grades II-IV patients. Herein, the aim of this study is to compare the  
23  
24 effectiveness of these treatment modalities in managing patients with VUR grades II, III, and IV by conducting a systematic  
25  
26 review and network meta-analysis.  
27  
28  
29  
30  
31  
32  
33  
34

## 35 **Methods**

### 36 37 **Search strategy**

1  
2  
3  
4 A systematic search was conducted in different databases including Pubmed, Embase, and Google scholar using both free text  
5 and MESH terms (vesicoureteral reflux; vesicoureteral reimplantation; endoscopic treatment or antibiotic prophylaxis). All  
6  
7 databases were searched from their inceptions to December 2022 without any language restriction. The search was performed  
8  
9 according to the Preferred Reporting Items for Systematic Reviews Involving a Network Meta-Analysis (PRISMA-NMA)  
10  
11 statement. The number of included and excluded studies were reported at each stage.  
12  
13  
14  
15

### 16 17 **Selection criteria**

18  
19  
20 Abstracts of the identified articles were manually reviewed, and full texts were assessed for those without clear eligibility. Only  
21  
22 were RCT studies comparing any two of four treatments (vesicoureteral reimplantation, endoscopic treatment, antibiotic  
23  
24 prophylaxis, or surveillance with no antibiotic prophylaxis) for managing primary VUR grades II-IV included in this study.  
25  
26 Studies which examined treatments for VUR grades I-V and provided separate results for each grade were also eligible for  
27  
28 inclusion.  
29  
30  
31

32  
33 Articles were excluded if treatment outcomes were not directly compared or if duplicate data on the same cohort were reported.  
34  
35 Studies with primary VUR grade I or V and those with secondary VUR, such as posterior urethral valves, neurological  
36  
37 abnormalities, other urological abnormalities, and kidney transplants, were also excluded.  
38  
39  
40  
41  
42  
43  
44

## Treatment modalities

Different treatment modalities for VUR grades II-IV reported in the included studies were AbxP, no AbxP, Sx Rx, and Endo Rx.

## Data extraction

Two investigators (C.L. Chang and C.H. Chen) extracted the data from each eligible study, including urinary tract infection (UTI), renal scarring for both old lesion progression and new scars formation, as well as resolution of VUR by cases and renal units. Another four investigators (C.K Hsu, Stephen S.D. Yang and S.J. Chang) checked the accuracy of extracted data, and a custom piloted spreadsheet was used for comparing those data for each variable of interest.

## Outcomes

Primary outcome was to compare the rate of urinary tract infection (UTI) according to the criteria defined by each study between treatment modalities.

Secondary outcomes were the rate of worsening of previous renal scars (i.e. progression of old lesions) and formation of new renal scars usually followed by technetium-99 m-labelled dimercaptosuccinic acid ( $^{99m}\text{Tc}$ -DMSA) scintigraphy and also the resolution rate of VUR.

### **Risk of bias assessment**

The Cochrane Collaboration risk of bias tool (RoB2) was used, and risks of bias, such as selection, performance, detection, attrition, and reporting bias, were evaluated for each included study.[18] Each item was rated as either low risk of bias, some concern (either lack of information or uncertainty over the potential for bias) or high risk of bias.

### **Statistical analysis**

Pairwise comparisons between studies were performed by Revman 5.4 software (www.cochrane.org), and R program software was used for conducting network meta-analysis. Frequentist model was adopted using netmeta package for estimating each treatment's effect. The statistical heterogeneity between the studies was measured by  $I^2$  and  $Q_{total}$  showing the overall inconsistency in the network. Network consistency was checked with netsplit method.[19] We conducted a pooled analysis of dichotomous outcomes using odds ratios (ORs) for pairwise comparisons and odds ratios in logarithmic scale (log ORs) for comparisons in network meta-analysis. Random-effects method was used to overcome the high heterogeneity between studies.

### **Certainty of the evidence**

1  
2  
3  
4 The certainty of the results from both pairwise comparisons and network meta-analysis were assessed with the methods provided  
5 in GRADE handbook. Overall certainty of evidence was based on risk of bias, inconsistency, indirectness, imprecision and  
6  
7 publication bias. Each result was graded into high, moderate, low or very low certainty.  
8  
9  
10

### 11 12 13 **Patient and Public involvement statement**

14  
15  
16  
17 Patients or the public were not involved in the conduct of this systematic review and network meta-analysis study. The analyses  
18  
19 were restricted to studies on children with VUR Grade II to IV. The main target audience includes pediatricians, urologists,  
20  
21 nephrologists and clinicians who have special interest in children with VUR.  
22  
23  
24  
25

### 26 **Results**

#### 27 28 **Search strategy and study characteristics**

29  
30  
31 The selection of articles was conducted according to the Preferred Reporting Items for Systematic Reviews and Meta-Analyses  
32  
33 (PRISMA) guidelines, and a total of 820 studies were initially selected. A final sample of 11 studies including 1447 children  
34  
35 with VUR grades II-IV were included, and the detailed process of selection is demonstrated in Fig 1. All 11 studies were  
36  
37  
38  
39  
40  
41  
42  
43  
44  
45  
46  
47

1  
2  
3  
4 randomized control trials and all of which were published in English language. The oldest age of enrolled children was 18 years.  
5  
6 Follow up periods varied from 1 to 5 years. Characteristics of the included studies are summarized in Table (1).  
7  
8

### 9 10 11 **Risk of bias**

12  
13 Nearly half of the included studies reported unclear information about randomization, allocation, and blinding of outcome  
14  
15 assessment. Two studies[20, 21] had severe missing outcome data, and they were rated as high risk of bias in missing outcome  
16  
17 data. Half of the included studies were considered for some concern as having bias in selection of reported results. For the  
18  
19 overall bias, approximately 20% of the included studies were considered having a high risk of bias, and the results were  
20  
21 summarized in Fig 2 (a) and (b).  
22  
23  
24  
25  
26

### 27 **Evaluation of inconsistency and fitness of the model of the network meta-analysis**

28  
29 The network evidence of UTI for four treatment modalities was demonstrated with network graph (Fig 3) including a total of 9  
30  
31 studies. Our model showed two strong arms (AbxP vs no AbxP and AbxP vs Sx Rx) each including 3 studies, and it consisted of  
32  
33 a closed loop between AbxP, Sx Rx, and Endo Rx. Both results of direct and indirect methods calculated by the netsplit method  
34  
35 did not show a significant difference between them. Therefore, no inconsistency was found in our model. For the fitness of  
36  
37  
38  
39  
40  
41  
42  
43  
44  
45  
46  
47

1  
2  
3  
4 model, only the studies which reported the outcomes of VUR grades II-IV were included, and fixed effect model was used due to  
5  
6 overall low heterogeneity among studies (Q value = 0.91).  
7  
8

## 9 10 11 **Synthesis of results** 12

13 In this study, the effectiveness of treatment modalities was pooled analyzed with primary outcomes (urinary tract infection)  
14  
15 simultaneously measured by network meta-analysis. Other outcomes such as renal scarring and resolution by renal units were  
16  
17 only analyzed by pairwise meta-analysis due to limited studies between treatments.  
18  
19

## 20 21 22 **Urinary tract infection** 23

24 A total of 9 studies[21-29] including 1013 participants reported the incidence of post-treatment UTI. The definitions of UTI were  
25  
26 positive urine culture and symptomatic or febrile UTI. Some studies did not report information about UTI definition.  
27  
28  
29

## 30 31 32 **Pairwise comparisons of UTI between different treatment modalities** 33

34 There was no significant difference in UTI recurrence among the treatment modalities. Sx Rx was associated with less UTI than  
35  
36 AbxP, but the difference was not significant (OR = 0.75, 95% CI = 0.43 to 1.29, p = 0.3). Endo Rx showed a higher risk of UTI  
37  
38 than AbxP, but the difference was not significant (OR = 2.03, 95% CI = 0.89 to 4.64, p = 0.09). Finally, there was no significant  
39  
40  
41  
42  
43  
44

1  
2  
3  
4 difference in UTI recurrence between AbxP or no AbxP (OR = 1.07, 95% CI = 0.51 to 2.24, p = 0.86). All results for each  
5  
6 treatment comparison are reported in Table (2).  
7

### 8 9 10 11 **Results from network meta-analysis**

12  
13 Sx Rx showed the lowest risk of UTI compared with other treatments reporting in Fig (4). However, the mixed comparison  
14  
15 results were not significant with low heterogeneity.  
16  
17

### 18 19 20 21 **Progression of old lesions**

22  
23 A total of 4 studies[20, 24-26] were pooled for the analysis. Three studies compared AbxP and Sx Rx, and one compared AbxP  
24  
25 and no AbxP. The pooled result showed that AbxP had potential for more progression of old lesions than Sx Rx (OR = 1.23,  
26  
27 95% CI = 0.79 to 1.93, p = 0.36), but the result was not significant.  
28  
29

### 30 31 32 33 **Formation of new renal scar**

34  
35 A total of 3 studies[20, 25, 29] with 641 participants were included. Two studies comparing AbxP and Sx Rx were pooled for  
36  
37 pairwise comparison, and no significant result was found between them (OR = 0.86, 95% CI = 0.51 to 1.44, p = 0.56). Another  
38  
39 study compared AbxP, no AbxP, and Endo Rx, and the results for these comparisons are reported in Table (2).  
40  
41  
42  
43  
44



### **Resolution by renal units (RRU)**

Of 4 studies[26-28, 30] which reported corrected VUR by renal units, 2 studies consisting of 160 participants compared Sx Rx and Endo Rx. The other 2 studies compared Sx Rx and AbxP as well as Endo Rx and AbxP. Sx Rx showed a significantly better resolution rate of VUR than Endo Rx (OR = 5.02, 95% CI = 1.47 to 17.13, p = 0.01). Both Sx Rx and Endo Rx showed better resolutions than AbxP, and the results are reported in Table (2).

### **Complications**

Most of the included studies did not report about complications except two studies.[21, 27] Ureteral stricture is one of possible complications of Sx Rx. Long term report of IRS study showed postoperative unilateral obstruction (6.6%, 10 in 151 patients) in which 7 patients (4.7%) needed further surgery.[21] Garcia-Aparicio et al also reported mild postoperative complications with hematuria (5.2%) and bladder spasm (5.2%).[27]

### **Certainty of the evidence**

About two third of the results from pairwise comparison were rated as moderate certainty as there were high risk of bias in randomization process and outcome data. Overall certainty of the evidence and summary of findings table for pairwise

1  
2  
3  
4 comparison was presented in table (3). For network meta-analysis, only surgical treatment was found having moderate certainty  
5 and the rest having high certainty. Certainty of evidence for each treatment was integrated with the results and the overall  
6  
7 summary of findings were reported in table(4).  
8  
9  
10

### 11 12 13 **Discussion**

14  
15 To our knowledge, this is the first network meta-analysis that compared different treatment modalities for patients with VUR  
16 grades II-IV. The effectiveness of each treatment in preventing the occurrence of post-treatment UTI was simultaneously  
17 compared by conducting network meta-analysis. Sx Rx showed the best outcome in reducing post-treatment UTI among patients  
18 with VUR grades II-IV followed by AbxP, no AbxP, and Endo Rx consecutively. However, mixed comparison results showed  
19 no significant differences. Pairwise comparisons for post-treatment UTI, progression of old lesions, and formation of new renal  
20 scar showed no significant differences between the treatment modalities. However, Sx Rx provided a better resolution rate of  
21 VUR grades II-IV than Endo Rx and AbxP.  
22  
23  
24  
25  
26  
27  
28  
29  
30  
31  
32  
33

34 Children with VUR have a high spontaneous resolution rate within the first 4-5 years of life.[31, 32] Male sex, young age,  
35 unilateral VUR have good resolution rate. Besides, it is also believed that VUR alone is not likely to cause renal damage without  
36 the presence of UTI.[33] Risk factors for UTI includes young age, high grade VUR, female sex and circumcision status in boys.  
37  
38  
39  
40  
41  
42  
43  
44

1  
2  
3  
4 Presence of bladder bowel dysfunction is also one of the important factors that influence VUR resolution rate and increase UTI  
5  
6 risk.[34]  
7

8  
9  
10  
11 ABxP is commonly used for children with VUR to prevent UTI recurrence. However, several studies have examined age, gender  
12  
13 and VUR severity to determine the efficacy of AbxP, and the results remain controversial. Swedish reflux study [29] and RIVUR  
14  
15 trial[35] supported using AbxP because of its significant reduction in UTI recurrence, but PRIVENT study[23] found a limited  
16  
17 effect of AbxP. A recent meta-analysis[17] comparing all grades of VUR showed that recurrent UTI was less in AbxP than no  
18  
19 AbxP group. In our study, there was no significant difference between AbxP and other treatments for UTI and renal damage.  
20  
21 This may be due to differences in age, gender and VUR severity of included studies.  
22  
23  
24  
25  
26

27  
28 Antibiotic resistance is an emerging problem for AbxP,[36] and this may affect the treatment outcomes. Adverse effects of long-  
29  
30 term antibiotic use such as allergic reaction, weaken immune system and *Clostridium difficile* infection should also be  
31  
32 considered. Becoming less effectiveness of AbxP, active surveillance without AbxP can be an alternative option. Being alert for  
33  
34 febrile UTI and early treatment to prevent renal damage are necessary. Therefore, understanding and compliance of the parents  
35  
36 play an important role for active surveillance.  
37  
38  
39  
40  
41  
42  
43  
44  
45  
46  
47

1  
2  
3  
4 Ureteral reimplantation has been used for decades with the most successful outcome for the correction of VUR. The principle of  
5 surgical correction is to mimic or strengthen the antireflux mechanism by creating the longer ureteral segment passing the tunnel  
6 between bladder mucosa and muscularis propria. Lich–Gregoir extravesical antireflux technique, Cohen intravesical  
7 reimplantation, and Politano–Leadbetter combined intra- and extravesical reimplantation technique are most commonly used  
8 methods.[37] Sx Rx included in our study are open ureteral reimplantation methods, mostly Cohen and Politano-Leadbetter  
9 technique. Despite a significant better resolution by renal units in Sx Rx, no significant difference was found in recurrent UTI  
10 and renal damage in our study. These results coincide with other meta-analyses[16, 17].  
11  
12  
13  
14  
15  
16  
17  
18  
19  
20  
21  
22  
23  
24

25 Another treatment option for VUR is Endo Rx which has been introduced over the last two decades [38]. Different bulking  
26 agents can be injected at ureteric orifice with the Traditional Subureteric Teflon Injection (STING) technique or Hydrodistension  
27 implantation technique (HIT) including the double HIT.[39] However, the choice of bulking agents may impact the safety and  
28 efficacy of Endo Rx as granuloma formation due to foreign body reaction, migration from injection site and periureteric fibrosis.  
29 Dextranomer/ hyaluronic acid (Dx/HA) showed low complication rates with short-term hematuria (0.2-0.8%), ureteral  
30 obstruction (0.5-1.3%), calcification (0.5%) and late ureteral implantation (2.7%).[40] Although Endo Rx showed significantly  
31  
32  
33  
34  
35  
36  
37  
38  
39  
40  
41  
42  
43  
44  
45  
46  
47

1  
2  
3  
4 lower resolution rate than Sx Rx, it is less invasive and uses easier technique than Sx Rx. However, clinicians must balance risks  
5  
6 and benefits of each procedure as well as their own surgical experiences.  
7  
8

9  
10  
11 Limitations of this study should be addressed. For low risks of bias, only randomized control studies were included in this study.  
12  
13 As many studies did not report separate data for VUR grades II-IV, they were excluded from current study for network  
14  
15 consistency and transitivity. Mixed treatment comparison could be performed by network meta-analysis only for UTI recurrence,  
16  
17 and the rest parameters could only be compared with pairwise comparisons. Moreover, robotic assisted surgery has been used to  
18  
19 correct VUR in children with body weight >10 kg [41, 42] while our study did not include it in this study. Therefore, future  
20  
21 research should consider including robotic assisted surgery as one of the treatment modalities. Last, but not least, our study could  
22  
23 not consider patients' age, febrile or symptomatic UTI, follow up times, and publication years because of limited included  
24  
25 studies.  
26  
27  
28  
29  
30

### 31 **Conclusion**

32  
33  
34 Surgical treatment was found to be more effective than other treatment options for resolving VUR. However, there was no  
35  
36 significant difference between the treatments in terms of their impact on UTI recurrence, progression of previous renal scars, or  
37  
38  
39  
40  
41  
42  
43

1  
2  
3  
4 formation of new renal scars. These findings provide evidence-based suggestions for the choice of treatment, which should be  
5  
6 individualized and based on the patient's risk factors.  
7  
8  
9

## 10 11 12 13 14 15 16 17 18 19 20 21 22 23 24 25 26 27 28 29 30 31 32 33 34 35 36 37 38 39 40 41 42 43 44 45 46 47

References

1. Chandra, M., *Reflux nephropathy, urinary tract infection, and voiding disorders*. *Curr Opin Pediatr*, 1995. **7**(2): p. 164-70.
2. Sargent, M.A., *What is the normal prevalence of vesicoureteral reflux?* *Pediatr Radiol*, 2000. **30**(9): p. 587-93.
3. Hunziker, M., E. Colhoun, and P. Puri, *Prevalence and predictors of renal functional abnormalities of high grade vesicoureteral reflux*. *J Urol*, 2013. **190**(4 Suppl): p. 1490-4.
4. Hoberman, A., et al., *Imaging studies after a first febrile urinary tract infection in young children*. *N Engl J Med*, 2003. **348**(3): p. 195-202.
5. Keren, R., et al., *Risk Factors for Recurrent Urinary Tract Infection and Renal Scarring*. *Pediatrics*, 2015. **136**(1): p. e13-21.
6. Lebowitz, R.L., et al., *International system of radiographic grading of vesicoureteric reflux. International Reflux Study in Children*. *Pediatr Radiol*, 1985. **15**(2): p. 105-9.
7. Arlen, A.M., et al., *Validation of the ureteral diameter ratio for predicting early spontaneous resolution of primary vesicoureteral reflux*. *J Pediatr Urol*, 2017. **13**(4): p. 383.e1-383.e6.
8. Garcia-Roig, M., et al., *Vesicoureteral Reflux Index: Predicting Primary Vesicoureteral Reflux Resolution in Children Diagnosed after Age 24 Months*. *J Urol*, 2017. **197**(4): p. 1150-1157.
9. Ntoulia, A., et al., *Contrast-enhanced voiding urosonography (ceVUS) with the intravesical administration of the ultrasound contrast agent Optison™ for vesicoureteral reflux detection in children: a prospective clinical trial*. *Pediatr Radiol*, 2018. **48**(2): p. 216-226.
10. Shimada, K., et al., *[Spontaneous resolution of reflux in children with primary VUR]*. *Nihon Hinyokika Gakkai Zasshi*, 1990. **81**(7): p. 982-7.
11. Springer, A. and R. Subramaniam, *Relevance of current guidelines in the management of VUR*. *Eur J Pediatr*, 2014. **173**(7): p. 835-43.

12. Teixeira, C.B.B., M.A.d.P. Cançado, and J.T.d.A. Carvalhaes, *Primary vesicoureteral reflux: conservative therapy or surgical intervention*. Brazilian Journal of Nephrology, 2014. **36**: p. 10-17.
13. Williams, G., E.M. Hodson, and J.C. Craig, *Interventions for primary vesicoureteric reflux*. Cochrane Database Syst Rev, 2019. **2**(2): p. Cd001532.
14. Teixeira, C.B., M.A. Cançado, and J.T. Carvalhaes, [*Primary vesicoureteral reflux: conservative therapy or surgical intervention*]. J Bras Nefrol, 2014. **36**(1): p. 10-7.
15. Wheeler, D., et al., *Antibiotics and surgery for vesicoureteric reflux: a meta-analysis of randomised controlled trials*. Arch Dis Child, 2003. **88**(8): p. 688-94.
16. Mina-Riascos, S.H., N. Fernández, and H.A. García-Perdomo, *Effectiveness and risks of endoscopic management compared to vesicoureteral reimplantation in patients with high-grade vesicoureteral reflux: systematic review and network meta-analysis*. Eur J Pediatr, 2021. **180**(5): p. 1383-1391.
17. Xie, M., et al., *Do Various Treatment Modalities of Vesicoureteral Reflux Have Any Adverse Effects in Pediatric Patients? A Meta-Analysis*. Urol Int, 2021. **105**(11-12): p. 1002-1010.
18. Sterne, J.A.C., et al., *RoB 2: a revised tool for assessing risk of bias in randomised trials*. Bmj, 2019. **366**: p. l4898.
19. Shim, S.R., et al., *Network meta-analysis: application and practice using R software*. Epidemiol Health, 2019. **41**: p. e2019013.
20. Olbing, H., et al., *Renal scars and parenchymal thinning in children with vesicoureteral reflux: a 5-year report of the International Reflux Study in Children (European branch)*. The Journal of urology, 1992. **148**(5): p. 1653-1656.
21. Jodal, U., et al., *Ten-year results of randomized treatment of children with severe vesicoureteral reflux. Final report of the International Reflux Study in Children*. Pediatric Nephrology, 2006. **21**(6): p. 785-792.
22. Hari, P., et al., *Antibiotic prophylaxis in the management of vesicoureteric reflux: a randomized double-blind placebo-controlled trial*. Pediatr Nephrol, 2015. **30**(3): p. 479-86.
23. Craig, J.C., et al., *Antibiotic prophylaxis and recurrent urinary tract infection in children*. New England Journal of Medicine, 2009. **361**(18): p. 1748-1759.
24. Pennesi, M., et al., *Is antibiotic prophylaxis in children with vesicoureteral reflux effective in preventing pyelonephritis and renal scars? A randomized, controlled trial*. Pediatrics, 2008. **121**(6): p. e1489-94.
25. Weiss, R., et al., *Results of a randomized clinical trial of medical versus surgical management of infants and children with grades III and IV primary vesicoureteral reflux (United States)*. The Journal of urology, 1992. **148**(5 Part 2): p. 1667-1673.
26. Group, B.R.S., *Prospective trial of operative versus non-operative treatment of severe vesicoureteric reflux: two years' observation in 96 children*. British Medical Journal (Clinical Research Edition), 1983: p. 171-174.

- 1
- 2
- 3
- 4
- 5 27. Garcia-Aparicio, L., et al., *Randomized clinical trial comparing endoscopic treatment with dextranomer hyaluronic acid*  
6 *copolymer and Cohen's ureteral reimplantation for vesicoureteral reflux: long-term results.* J Pediatr Urol, 2013. **9**(4): p.  
7 483-7.
- 8 28. Capozza, N. and P. Caione, *Dextranomer/hyaluronic acid copolymer implantation for vesico-ureteral reflux: a*  
9 *randomized comparison with antibiotic prophylaxis.* J Pediatr, 2002. **140**(2): p. 230-4.
- 10 29. Brandström, P., et al., *The Swedish reflux trial: review of a randomized, controlled trial in children with dilating*  
11 *vesicoureteral reflux.* J Pediatr Urol, 2011. **7**(6): p. 594-600.
- 12 30. Salih, E.M., et al., *Comparison of Subureteral Endoscopic Injection of Dextranomer/Hyaluronic Acid and Lich-Gregoir*  
13 *Ureteral Reimplantation in the Treatment of Pediatric Primary Vesicoureteral Reflux: A Prospective Randomized Study.* J  
14 Laparoendosc Adv Surg Tech A, 2021. **31**(6): p. 719-723.
- 15 31. Estrada, C.R., Jr., et al., *Nomograms for predicting annual resolution rate of primary vesicoureteral reflux: results from*  
16 *2,462 children.* J Urol, 2009. **182**(4): p. 1535-41.
- 17 32. Hajiyev, P. and B. Burgu, *Contemporary Management of Vesicoureteral Reflux.* Eur Urol Focus, 2017. **3**(2-3): p. 181-188.
- 18 33. Swerkersson, S., et al., *Urinary tract infection in small children: the evolution of renal damage over time.* Pediatr  
19 Nephrol, 2017. **32**(10): p. 1907-1913.
- 20 34. Elder, J.S. and M. Diaz, *Vesicoureteral reflux--the role of bladder and bowel dysfunction.* Nat Rev Urol, 2013. **10**(11): p.  
21 640-8.
- 22 35. Mattoo, T.K., et al., *Renal scarring in the randomized intervention for children with vesicoureteral reflux (RIVUR) trial.*  
23 *Clinical Journal of the American Society of Nephrology*, 2016. **11**(1): p. 54-61.
- 24 36. Cheng, C.H., et al., *Antibiotic resistance patterns of community-acquired urinary tract infections in children with*  
25 *vesicoureteral reflux receiving prophylactic antibiotic therapy.* Pediatrics, 2008. **122**(6): p. 1212-7.
- 26 37. Austin, J.C. and C.S. Cooper, *Vesicoureteral reflux: surgical approaches.* Urol Clin North Am, 2004. **31**(3): p. 543-57, x.
- 27 38. Calisti, A., et al., *Endoscopic subureteral injection for vesicoureteral reflux and the risk of overtreatment.* Minerva  
28 Pediatr, 2009. **61**(1): p. 1-7.
- 29 39. Yap, T.L., et al., *STING versus HIT technique of endoscopic treatment for vesicoureteral reflux: A systematic review and*  
30 *meta-analysis.* J Pediatr Surg, 2016. **51**(12): p. 2015-2020.
- 31 40. Kirsch, A.J., C.S. Cooper, and G. Läckgren, *Non-Animal Stabilized Hyaluronic Acid/Dextranomer Gel (NASHA/Dx, Deflux)*  
32 *for Endoscopic Treatment of Vesicoureteral Reflux: What Have We Learned Over the Last 20 Years?* Urology, 2021. **157**:  
33 p. 15-28.  
34  
35  
36  
37  
38  
39  
40  
41  
42  
43  
44  
45  
46  
47



- 1  
2  
3  
4 41. Finkelstein, J.B., et al., *How to decide which infant can have robotic surgery? Just do the math.* J Pediatr Urol, 2015.  
5 **11**(4): p. 170.e1-4.  
6  
7 42. Herz, D., et al., *Robot-assisted laparoscopic extravesical ureteral reimplant: A critical look at surgical outcomes.* J Pediatr  
8 Urol, 2016. **12**(6): p. 402.e1-402.e9.  
9

### 10 11 **Acknowledgement**

12  
13 The authors would like to thank the team of Taipei Tzu Chi Hospital Library and the research team of Taipei Tzu Chi Hospital  
14 for their support in the database search and the development of this paper.  
15  
16  
17

### 18 19 20 **Funding**

21  
22 This study was supported by a grant from the Taipei Tzu Chi Hospital, Buddhist Tzu Chi Medical Foundation (Grant No.  
23 TCRD-TPE-110-12)  
24  
25  
26  
27

### 28 29 30 **Author Contributions Statement**

31  
32 C.L Chang and C.H Chen conceptualized and designed the study, performed data collection, data analysis and drafted the  
33 original manuscript. S.D Yang, C.K Hsu and S.J. Chang coordinated and supervised data collection, and critically reviewed the  
34 manuscript. All authors reviewed and approved the final manuscript as submitted and agree to be accountable for all aspects of  
35 the work.  
36  
37  
38  
39  
40  
41  
42  
43  
44  
45  
46  
47

## Legends to The Figures

**Fig. 1** Research flow chart

**Fig. 2(a)** Risk of bias graph: each risk of bias component displayed as percentage across papers

**Fig. 2(b)** Risk of bias summary: each risk of bias component for each paper

**Fig. 3** Network graph of each treatment for UTI

**Fig. 4** Comparison of UTI recurrence after each treatment of VUR

**Table 1** Study characteristics of included studies

**Table 2** Results for pairwise comparisons of different treatment modalities

**Table 3** Summary of findings of GRADE analysis for pairwise comparisons

**Table 4** Summary of findings of GRADE analysis for network meta-analysis

Confidential: For Review Only

1  
2  
3  
4  
5  
6  
7  
8  
9  
10  
11  
12  
13  
14  
15  
16  
17  
18  
19  
20  
21  
22  
23  
24  
25  
26  
27  
28  
29  
30  
31  
32  
33  
34  
35  
36  
37  
38  
39  
40  
41  
42  
43  
44  
45  
46  
47  
48  
49  
50  
51  
52  
53  
54  
55  
56  
57  
58  
59  
60

**Table (1) Study characteristics of included studies**

| <b>Author/year</b>              | <b>Country</b> | <b>VUR Grade</b>                        | <b>Age</b> | <b>Follow up</b> | <b>UTI definition</b> | <b>Comparisons</b>         |
|---------------------------------|----------------|-----------------------------------------|------------|------------------|-----------------------|----------------------------|
| <b>Hari 2015[22]</b>            | India          | VUR grade III, IV                       | <12 yrs    | 1 yr             | (+) UC                | AbxP vs no AbxP            |
| <b>Craig 2009[23]</b>           | Australia      | VUR grade III, IV                       | <18 yrs    | 1 yrs            | (+) UC                | AbxP vs no AbxP            |
| <b>Pennesi 2008[24]</b>         | Italy          | VUR grade II, III, IV                   | <2.5 yrs   | 4 yrs            | Febrile UTI           | AbxP vs no AbxP            |
| <b>Olbing 1992[20]</b>          | Germany        | VUR grade III, IV                       | <11 yrs    | 5 yrs            | No information        | AbxP vs Sx Rx              |
| <b>Jodal 2006[21]</b>           | US             | VUR grade III, IV                       | <11 yrs    | 5 yrs            | (+) UC                | AbxP vs Sx Rx              |
| <b>Weiss 1992[25]</b>           | US             | VUR grade III, IV                       | < 10 yrs   | 4.5 yrs          | No information        | AbxP vs Sx Rx              |
| <b>BRSg 1983[26]</b>            | UK             | VUR grade III or grade II with scarring | >1 yr      | 2 yrs            | (+) UC                | Sx Rx vs AbxP              |
| <b>Garcia-Aparicio 2013[27]</b> | Spain          | VUR grade II, III, IV                   | >1 yr      | 5 yrs            | No information        | Endo Rx vs Sx Rx           |
| <b>Capozza 2002[28]</b>         | Italy          | VUR grade II, III, IV                   | >1 yr      | 1 yr             | (+) UC                | Endo Rx vs AbxP            |
| <b>Brandstrom 2011[29]</b>      | Sweden         | VUR grade III, IV                       | 1-2 yrs    | 2 yrs            | Febrile UTI           | Endo Rx vs AbxP vs no AbxP |
| <b>Salih 2021[30]</b>           | Egypt          | VUR grade III, IV                       | 1- 10 yrs  | 2 yrs            | No information        | Endo Rx vs Sx Rx           |

*VUR: vesicoureteral reflux, UC: urine culture, UTI: urinary tract infection, AbxP: antibiotic prophylaxis, Sx Rx: surgical treatment, Endo Rx: endoscopic treatment*

**Table (2) Results for pairwise comparisons of different treatment modalities**

| Outcomes                        | Treatment comparisons<br>Treatment (1) vs (2) -<br>references of included<br>studies | Treatment (1)<br>Total E/C<br>(n/n) | Treatment (2)<br>Total E/C (n/n) | OR (95%CI)          |
|---------------------------------|--------------------------------------------------------------------------------------|-------------------------------------|----------------------------------|---------------------|
| UTI                             | Sx Rx vs AbxP - [22-24]                                                              | 50/238                              | 63/235                           | 0.75(0.43,1.29)     |
|                                 | Endo Rx vs AbxP -[28, 29]                                                            | 20/105                              | 10/90                            | 2.03(0.89,4.64)     |
|                                 | AbxP vs No AbxP -[21, 25,<br>26]                                                     | 26/152                              | 24/145                           | 1.07(0.51,2.24)     |
|                                 | Endo Rx vs Sx Rx -[27]                                                               | 2/22                                | 0/19                             | Not estimable       |
| Progression of<br>old lesions   | AbxP vs Sx Rx - [20, 25, 26]                                                         | 52/270                              | 43/264                           | 1.23(0.79,1.93)     |
|                                 | AbxP vs No AbxP -[24]                                                                | 1/50                                | 9/50                             | 0.09(0.01,0.76)     |
| Formation of<br>new renal scars | AbxP vs Sx Rx - [20, 25]                                                             | 33/223                              | 36/215                           | 0.86(0.51,1.44)     |
|                                 | AbxP vs No AbxP - [29]                                                               | 0/69                                | 9/68                             | Not estimable       |
|                                 | AbxP vs Endo Rx - [29]                                                               | 0/69                                | 6/66                             | Not estimable       |
|                                 | Endo Rx vs No Abxb - [29]                                                            | 6/66                                | 9/68                             | 0.66(0.22,1.96)     |
| RRU                             | Sx Rx vs Endo Rx - [27, 30]                                                          | 77/80                               | 66/80                            | 5.02(1.47,17.13)    |
|                                 | Sx Rx vs AbxP - [26]                                                                 | 67/69                               | 17/65                            | 94.59(20.87,428.74) |
|                                 | Endo Rx vs AbxP - [28]                                                               | 40/52                               | 10/30                            | 8.33(3.14,22.13)    |

*E/C: events/cases, OR: odd ratio, UTI: urinary tract infection, Sx Rx: surgical treatment, AbxP: antibiotic prophylaxis, Endo Rx: endoscopic treatment, RRU: resolution by renal units*

**Table (3) Summary of findings of GRADE analysis for pairwise comparisons**

| Certainty assessment                                                          |                      |                   |                  |                 |                      |                                       | Summary of findings      |                       |                                    |                                 |                                                                    |
|-------------------------------------------------------------------------------|----------------------|-------------------|------------------|-----------------|----------------------|---------------------------------------|--------------------------|-----------------------|------------------------------------|---------------------------------|--------------------------------------------------------------------|
| Participant<br>s<br>(studies)<br>Follow-up                                    | Risk<br>of<br>bias   | Inconsistenc<br>y | Indirectnes<br>s | Imprecisio<br>n | Publicatio<br>n bias | Overall certaint<br>y of evidenc<br>e | Study event rates<br>(%) |                       | Relativ<br>e effect<br>(95%<br>CI) | Anticipated absolute<br>effects |                                                                    |
|                                                                               |                      |                   |                  |                 |                      |                                       | With Contro<br>l         | With Interventio<br>n |                                    | Risk<br>with Contro<br>l        | Risk<br>difference<br>with Interventio<br>n                        |
| <b>UTI recurrence (AbxP vs No AbxP) (follow-up: range 1 years to 4 years)</b> |                      |                   |                  |                 |                      |                                       |                          |                       |                                    |                                 |                                                                    |
| 297<br>(3 RCTs)                                                               | not serious          | not serious       | not serious      | not serious     | none                 | ⊕⊕⊕⊕<br>High                          | 24/145<br>(16.6%)        | 26/152<br>(17.1%)     | <b>OR 1.07</b><br>(0.51 to 2.24)   | 166<br>per<br>1,000             | <b>10 more<br/>per 1,000</b><br>(from 74<br>fewer to 142<br>more)  |
| <b>UTI recurrence(Sx Rx vs AbxP) (follow-up: range 2 years to 5 years)</b>    |                      |                   |                  |                 |                      |                                       |                          |                       |                                    |                                 |                                                                    |
| 473<br>(3 RCTs)                                                               | serious <sup>a</sup> | not serious       | not serious      | not serious     | none                 | ⊕⊕⊕<br>○<br>Moderate                  | 63/235<br>(26.8%)        | 50/238<br>(21.0%)     | <b>OR 0.75</b><br>(0.43 to 1.29)   | 268<br>per<br>1,000             | <b>53 fewer<br/>per 1,000</b><br>(from 132<br>fewer to 53<br>more) |
| <b>UTI recurrence(Endo Rx vs AbxP) (follow-up: range 1 years to 2 years)</b>  |                      |                   |                  |                 |                      |                                       |                          |                       |                                    |                                 |                                                                    |
| 195<br>(2 RCTs)                                                               | not serious          | not serious       | not serious      | not serious     | none                 | ⊕⊕⊕⊕<br>High                          | 10/90<br>(11.1%)         | 20/105<br>(19.0%)     | <b>OR 2.03</b><br>(0.89 to 4.64)   | 111<br>per<br>1,000             | <b>91 more<br/>per 1,000</b><br>(from 11<br>fewer to 256<br>more)  |
| <b>UTI recurrence(Endo Rx vs Sx Rx) (follow-up: median 1 years)</b>           |                      |                   |                  |                 |                      |                                       |                          |                       |                                    |                                 |                                                                    |
| 41<br>(1 RCT)                                                                 | not serious          | not serious       | not serious      | not serious     | none                 | ⊕⊕⊕⊕<br>High                          | 0/19<br>(0.0%)           | 2/22 (9.1%)           | not estimabl<br>e                  | 0 per<br>1,000                  |                                                                    |

**Table (3) Summary of findings of GRADE analysis for pairwise comparisons**

| Certainty assessment                                                                |                      |             |             |             |      | Summary of findings  |                   |                   |                                   |                     |                                                                      |
|-------------------------------------------------------------------------------------|----------------------|-------------|-------------|-------------|------|----------------------|-------------------|-------------------|-----------------------------------|---------------------|----------------------------------------------------------------------|
| <b>Progression of old lesion(AbxP vs Sx Rx) (follow-up: range 2 to 5 years)</b>     |                      |             |             |             |      |                      |                   |                   |                                   |                     |                                                                      |
| 534<br>(3 RCTs)                                                                     | serious <sup>a</sup> | not serious | not serious | not serious | none | ⊕⊕⊕<br>○<br>Moderate | 43/264<br>(16.3%) | 52/270<br>(19.3%) | <b>OR 1.23</b><br>(0.79 to 1.93)  | 163<br>per<br>1,000 | <b>30 more<br/>per 1,000</b><br>(from 30<br>fewer to 110<br>more)    |
| <b>Progression of old lesion(AbxP vs No AbxP) (follow-up: median 4 years)</b>       |                      |             |             |             |      |                      |                   |                   |                                   |                     |                                                                      |
| 100<br>(1 RCT)                                                                      | not serious          | not serious | not serious | not serious | none | ⊕⊕⊕⊕<br>High         | 9/50<br>(18.0%)   | 1/50 (2.0%)       | <b>OR 0.09</b><br>(0.01 to 0.76)  | 180<br>per<br>1,000 | <b>161 fewer<br/>per 1,000</b><br>(from 178<br>fewer to 37<br>fewer) |
| <b>Formation of new renal scars(AbxP vs Sx Rx) (follow-up: range 4 to 5 years)</b>  |                      |             |             |             |      |                      |                   |                   |                                   |                     |                                                                      |
| 438<br>(2 RCTs)                                                                     | serious <sup>a</sup> | not serious | not serious | not serious | none | ⊕⊕⊕<br>○<br>Moderate | 36/215<br>(16.7%) | 33/223<br>(14.8%) | <b>OR 0.86</b><br>(0.51 to 1.44)  | 167<br>per<br>1,000 | <b>20 fewer<br/>per 1,000</b><br>(from 74<br>fewer to 57<br>more)    |
| <b>Formation of new renal scars(Endo Rx vs No AbxP) (follow-up: median 2 years)</b> |                      |             |             |             |      |                      |                   |                   |                                   |                     |                                                                      |
| 134<br>(1 RCT)                                                                      | serious <sup>b</sup> | not serious | not serious | not serious | none | ⊕⊕⊕<br>○<br>Moderate | 9/68<br>(13.2%)   | 6/66 (9.1%)       | <b>OR 0.66</b><br>(0.22 to 1.96)  | 132<br>per<br>1,000 | <b>41 fewer<br/>per 1,000</b><br>(from 100<br>fewer to 98<br>more)   |
| <b>RRU(Sx Rx vs Endo Rx) (follow-up: range 2 to 5 years)</b>                        |                      |             |             |             |      |                      |                   |                   |                                   |                     |                                                                      |
| 160<br>(2 RCTs)                                                                     | serious <sup>b</sup> | not serious | not serious | not serious | none | ⊕⊕⊕<br>○<br>Moderate | 66/80<br>(82.5%)  | 77/80<br>(96.3%)  | <b>OR 5.02</b><br>(1.47 to 17.13) | 825<br>per<br>1,000 | <b>134 more<br/>per 1,000</b><br>(from 49<br>more to 163<br>more)    |

**Table (3) Summary of findings of GRADE analysis for pairwise comparisons**

| Certainty assessment                                    |                      |             |             |             |      | Summary of findings  |                  |                  |                                      |               |                                                          |
|---------------------------------------------------------|----------------------|-------------|-------------|-------------|------|----------------------|------------------|------------------|--------------------------------------|---------------|----------------------------------------------------------|
| <b>RRU(Sx Rx vs AbxP) (follow-up: median 2 years)</b>   |                      |             |             |             |      |                      |                  |                  |                                      |               |                                                          |
| 134<br>(1 RCT)                                          | serious <sup>b</sup> | not serious | not serious | not serious | none | ⊕⊕⊕<br>○<br>Moderate | 17/65<br>(26.2%) | 67/69<br>(97.1%) | <b>OR 94.59</b><br>(20.87 to 428.74) | 262 per 1,000 | <b>709 more per 1,000</b><br>(from 619 more to 732 more) |
| <b>RRU(Endo Rx vs AbxP) (follow-up: median 1 years)</b> |                      |             |             |             |      |                      |                  |                  |                                      |               |                                                          |
| 82<br>(1 RCT)                                           | serious <sup>b</sup> | not serious | not serious | not serious | none | ⊕⊕⊕<br>○<br>Moderate | 10/30<br>(33.3%) | 40/52<br>(76.9%) | <b>OR 8.33</b><br>(3.14 to 22.13)    | 333 per 1,000 | <b>473 more per 1,000</b><br>(from 278 more to 584 more) |

**CI:** confidence interval; **OR:** odds ratio

**GRADE Working Group grades of evidence**

**High certainty:** we are very confident that the true effect lies close to that of the estimate of the effect.

**Moderate certainty:** we are moderately confident in the effect estimate: the true effect is likely to be close to the estimate of the effect, but there is a possibility that it is substantially different.

**Low certainty:** our confidence in the effect estimate is limited: the true effect may be substantially different from the estimate of the effect.

**Very low certainty:** we have very little confidence in the effect estimate: the true effect is likely to be substantially different from the estimate of effect.

**Explanations**

- a. Unclear explanation of randomization process in two studies and some missing data in one study
- b. Unclear explanation of randomization process



Table (4) Summary of findings of GRADE analysis for network meta-analysis

Patient or population: VUR Grade II-IV  
 Setting: Various treatment modalities in children with VUR Grade II-IV  
 Interventions: Surgical treatment, Endoscopic treatment,  
 Conservative treatment  
 Comparison: Antibiotic prophylaxis  
 Outcome: UTI recurrence

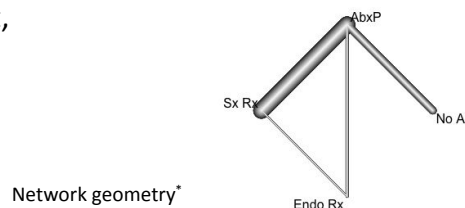

| Total studies: 9 RCTs<br>Total participants:<br>1013 | NMA estimate<br>effect**<br>(95% CI) | NMA Certainty<br>in the evidence | Ranking***<br>(P-score) | Interpretation          |
|------------------------------------------------------|--------------------------------------|----------------------------------|-------------------------|-------------------------|
| Surgical treatment<br>(Sx Rx)                        | <b>-0.26</b><br>(-0.54 to 0.02)      | ⊕⊕⊕○<br>Moderate <sup>a</sup>    | 0.85                    | Probably superior       |
| Antibiotic prophylaxis<br>(AbxP)                     | Reference<br>comparator              | Reference<br>comparator          | 0.43                    | Reference<br>comparator |
| Endoscopic<br>treatment<br>(Endo Rx)                 | <b>0.2</b><br>(-1.41 to 1.81)        | ⊕⊕⊕⊕<br>High                     | 0.38                    | Probably<br>inferior    |
| Conservative treatment<br>(No AbxP)                  | <b>0.15</b><br>(-0.45 to 0.75)       | ⊕⊕⊕⊕<br>High                     | 0.31                    | Probably<br>inferior    |

**NMA-SoF table definitions**

\*Lines represent direct comparisons

\*\*Network estimate effects are reported as Log OR and the results are expressed in 95% confident interval since the frequentist model has been conducted.

\*\*\*Ranking is calculated by P-score by netrank function

---

**GRADE Working Group grades of evidence**

**High certainty:** we are very confident that the true effect lies close to that of the estimate of the effect.

**Moderate certainty:** we are moderately confident in the effect estimate: the true effect is likely to be close to the estimate of the effect, but there is a possibility that it is substantially different.

**Low certainty:** our confidence in the effect estimate is limited: the true effect may be substantially different from the estimate of the effect.

**Very low certainty:** we have very little confidence in the effect estimate: the true effect is likely to be substantially different from the estimate of effect.

---

**Explanations**

a. Unclear explanation of randomization process in two studies and some missing data in one study

---

1  
2  
3  
4  
5  
6  
7  
8  
9  
10  
11  
12  
13  
14  
15  
16  
17  
18  
19  
20  
21  
22  
23  
24  
25  
26  
27  
28  
29  
30  
31  
32  
33  
34  
35  
36  
37  
38  
39  
40  
41  
42  
43  
44  
45  
46  
47  
48  
49  
50  
51  
52  
53  
54  
55  
56  
57  
58  
59  
60



435x413mm (72 x 72 DPI)

1  
2  
3  
4  
5  
6  
7  
8  
9  
10  
11  
12  
13  
14  
15  
16  
17  
18  
19  
20  
21  
22  
23  
24  
25  
26  
27  
28  
29  
30  
31  
32  
33  
34  
35  
36  
37  
38  
39  
40  
41  
42  
43  
44  
45  
46  
47  
48  
49  
50  
51  
52  
53  
54  
55  
56  
57  
58  
59  
60



586x174mm (72 x 72 DPI)

1  
2  
3  
4  
5  
6  
7  
8  
9  
10  
11  
12  
13  
14  
15  
16  
17  
18  
19  
20  
21  
22  
23  
24  
25  
26  
27  
28  
29  
30  
31  
32  
33  
34  
35  
36  
37  
38  
39  
40  
41  
42  
43  
44  
45  
46  
47  
48  
49  
50  
51  
52  
53  
54  
55  
56  
57  
58  
59  
60

|            |                      | Risk of bias domains |    |    |    |    |         |
|------------|----------------------|----------------------|----|----|----|----|---------|
|            |                      | D1                   | D2 | D3 | D4 | D5 | Overall |
| Study      | Hari 2015            | +                    | +  | +  | +  | +  | +       |
|            | Craig 2009           | +                    | +  | +  | +  | +  | +       |
|            | Pennesi 2008         | +                    | +  | +  | +  | -  | -       |
|            | Olbing 1992          | -                    | +  | X  | +  | +  | X       |
|            | Jodal 2006           | +                    | +  | X  | +  | +  | X       |
|            | Weiss 1992           | -                    | +  | +  | +  | +  | -       |
|            | BRSg 1983            | -                    | +  | +  | +  | -  | -       |
|            | Garcia-Aparicio 2013 | +                    | +  | +  | +  | -  | -       |
|            | Capozza 2002         | -                    | +  | +  | +  | +  | -       |
|            | Brandstrom 2011      | -                    | +  | +  | +  | -  | -       |
| Salih 2021 | -                    | +                    | +  | +  | -  | -  |         |

Domains:  
 D1: Bias arising from the randomization process.  
 D2: Bias due to deviations from intended intervention.  
 D3: Bias due to missing outcome data.  
 D4: Bias in measurement of the outcome.  
 D5: Bias in selection of the reported result.

Judgement  
 High  
 Some concerns  
 Low

547x471mm (72 x 72 DPI)

1  
2  
3  
4  
5  
6  
7  
8  
9  
10  
11  
12  
13  
14  
15  
16  
17  
18  
19  
20  
21  
22  
23  
24  
25  
26  
27  
28  
29  
30  
31  
32  
33  
34  
35  
36  
37  
38  
39  
40  
41  
42  
43  
44  
45  
46  
47  
48  
49  
50  
51  
52  
53  
54  
55  
56  
57  
58  
59  
60



228x150mm (72 x 72 DPI)

1  
2  
3  
4  
5  
6  
7  
8  
9  
10  
11  
12  
13  
14  
15  
16  
17  
18  
19  
20  
21  
22  
23  
24  
25  
26  
27  
28  
29  
30  
31  
32  
33  
34  
35  
36  
37  
38  
39  
40  
41  
42  
43  
44  
45  
46  
47  
48  
49  
50  
51  
52  
53  
54  
55  
56  
57  
58  
59  
60



176x116mm (72 x 72 DPI)

# BMJ Paediatrics Open

## Effectiveness of Various Treatment Modalities in Children with Vesicoureteral Reflux Grade II to IV: A Systematic Review and Network Meta-analysis

|                               |                                                                                                                                                                                                                                                                                                                            |
|-------------------------------|----------------------------------------------------------------------------------------------------------------------------------------------------------------------------------------------------------------------------------------------------------------------------------------------------------------------------|
| Journal:                      | <i>BMJ Paediatrics Open</i>                                                                                                                                                                                                                                                                                                |
| Manuscript ID                 | bmjpo-2023-002096.R2                                                                                                                                                                                                                                                                                                       |
| Article Type:                 | Original research                                                                                                                                                                                                                                                                                                          |
| Date Submitted by the Author: | 25-Jul-2023                                                                                                                                                                                                                                                                                                                |
| Complete List of Authors:     | Chang, Chia-Lun; Taipei Tzu Chi General Hospital<br>Yang, Stephen S.; Taipei Tzu Chi General Hospital<br>Hsu, Chun-Kai; Taipei Tzu Chi General Hospital<br>Chen, Chun-Hua; Taipei municipal Wanfang hospital, Taipei, Taiwan.<br>chang, shang-jen; National Taiwan University Hospital, ; Taipei Tzu Chi General Hospital, |
| Keywords:                     | Statistics, Nephrology                                                                                                                                                                                                                                                                                                     |
|                               |                                                                                                                                                                                                                                                                                                                            |

SCHOLARONE™  
Manuscripts





I, the Submitting Author has the right to grant and does grant on behalf of all authors of the Work (as defined in the below author licence), an exclusive licence and/or a non-exclusive licence for contributions from authors who are: i) UK Crown employees; ii) where BMJ has agreed a CC-BY licence shall apply, and/or iii) in accordance with the terms applicable for US Federal Government officers or employees acting as part of their official duties; on a worldwide, perpetual, irrevocable, royalty-free basis to BMJ Publishing Group Ltd ("BMJ") its licensees and where the relevant Journal is co-owned by BMJ to the co-owners of the Journal, to publish the Work in this journal and any other BMJ products and to exploit all rights, as set out in our [licence](#).

The Submitting Author accepts and understands that any supply made under these terms is made by BMJ to the Submitting Author unless you are acting as an employee on behalf of your employer or a postgraduate student of an affiliated institution which is paying any applicable article publishing charge ("APC") for Open Access articles. Where the Submitting Author wishes to make the Work available on an Open Access basis (and intends to pay the relevant APC), the terms of reuse of such Open Access shall be governed by a Creative Commons licence – details of these licences and which [Creative Commons](#) licence will apply to this Work are set out in our licence referred to above.

Other than as permitted in any relevant BMJ Author's Self Archiving Policies, I confirm this Work has not been accepted for publication elsewhere, is not being considered for publication elsewhere and does not duplicate material already published. I confirm all authors consent to publication of this Work and authorise the granting of this licence.

1  
2  
3  
4 **Effectiveness of Various Treatment Modalities in Children with Vesicoureteral Reflux**  
5  
6 **Grade II to IV: A Systematic Review and Network Meta-analysis**  
7

8 Chia-Lun Chang<sup>1,2</sup>, Stephen Shei-Dei Yang<sup>1,2</sup>, Chun-Kai Hsu<sup>1,2</sup>, Chun-Hua Chen<sup>3</sup>, Shang-Jen Chang<sup>1,4</sup>

- 9  
10 1. Department of Urology, Taipei Tzu Chi Hospital, Buddhist Tzu Chi Medical Foundation, New Taipei  
11 City, 231, Taiwan.  
12  
13 2. Department of Urology, School of Medicine, Tzu Chi University, Hualien, 970, Taiwan.  
14  
15 3. Department of Neurology, Taipei municipal Wanfang hospital, Taipei, Taiwan.  
16  
17 4. Department of Urology, National Taiwan University Hospital, Taipei, Taiwan  
18  
19  
20  
21

22 Address correspondence and reprint requests to: Shang-Jen Chang

- 23  
24 1. Department of Urology, Taipei Tzu Chi Hospital, Buddhist Tzu Chi Medical Foundation, New Taipei  
25 City, 231, Taiwan  
26  
27 2. Department of Urology, National Taiwan University Hospital, Taipei, Taiwan  
28  
29

30 Tel: +886-2-23123456

31  
32 Fax: +886-2-23123456

33  
34 E-mail: 018484@ntuh.gov.tw

35  
36  
37 Address: No.7, Chung Shan S. Rd. ( Zhongshan S. Rd. ) , Zhongzheng Dist., Taipei City,  
38 100225  
39  
40  
41  
42  
43  
44  
45  
46  
47  
48  
49  
50  
51  
52  
53  
54  
55  
56  
57  
58  
59  
60

## ABSTRACT

Background: Vesicoureteral reflux (VUR) is one of the most common risk factors of urinary tract infection (UTI) among children. Various treatment modalities including antibiotic prophylaxis, surgical or endoscopic corrections, and conservative treatment were used depending on the severity of VUR. The aim of this study is to compare the effectiveness of these treatment modalities in children with VUR grades II-IV by conducting a systematic review and network meta-analysis.

Methods: A systematic search from different databases was performed from their earliest records to December 2022 without any language restriction. Only randomized control trials were included in this study. Effectiveness of treatment modalities were mainly compared by UTI. Other outcomes for renal scarring and resolution by renal units were also measured between treatments.

Results: A total of 11 studies with 1447 children were included in this study. While comparing with antibiotic prophylaxis in network meta-analysis for UTI recurrence, surgical treatment probably lowers the rate of UTI recurrence (Log OR -0.26, 95%CI -0.54 to 0.02, high quality). However, endoscopic treatment (Log OR 0.2, 95%CI -1.41 to 1.81, high quality) and conservative treatment (Log OR 0.15, 95%CI -0.45 to 0.75, high quality) revealed probably inferior to antibiotic treatment.

Conclusion: Both pairwise and network meta-analytic results probably showed no difference between the treatments in terms of their impact on UTI recurrence, progression of previous renal scars, or formation of new renal scars in children with VUR Grade II-IV.

1  
2  
3  
4 These findings may offer a better understanding of each treatment and evidence-based  
5  
6 suggestions for the choice of treatment, which should be individualized and based on the  
7  
8 patient's risk factors.  
9

10  
11  
12 What is already known on this topic?  
13

14  
15  
16 Reimplantation surgery provides a significantly better reflux resolution in children with  
17  
18 vesicoureteral reflux.  
19

20  
21  
22 What this study adds  
23

24  
25 There is no significant difference in UTI recurrence rate, renal scar progressions and new  
26  
27 renal scar formation in VUR grades II-IV between antibiotic prophylaxis, endoscopic  
28  
29 surgery and reimplantation surgery.  
30

31  
32  
33 How this study might affect research, practice or policy  
34

35  
36  
37 The choice of treatment should be individualized and risk-based approach. Physicians' and  
38  
39 parents' preference should also be considered because of no significant differences between  
40  
41 antibiotic prophylaxis, endoscopic surgery and reimplantation surgery in preventing UTI  
42  
43 recurrence and renal scarring.  
44

## 45 46 47 **Introduction** 48

49  
50 Primary vesicoureteral reflux (VUR), the reflux of urine into the ureter or the kidney due to  
51  
52 anti-reflux failure in vesicoureteral junction[1], is a common risk factor of urinary tract  
53  
54 infection (UTI) among children. The incidence of VUR among normal children is 0.5 to  
55  
56  
57  
58  
59  
60

1  
2  
3  
4 3%.[2] However, in those with UTI combined with VUR, the incidence rises to 30 to  
5  
6 40%.[3, 4] It is also a potential risk factor for various renal problems like pyelonephritis,  
7  
8 renal scarring, and chronic kidney disease.[5]  
9

10  
11  
12 The grading of VUR is mostly defined by the use of radiographic classification based on  
13  
14 the degree of filling and dilatation of the ureter, renal pelvis, and calyces by the  
15  
16 International Reflux Study group.[6] Voiding cystourethrogram (VCUG) is the gold  
17  
18 standard for diagnosing VUR and defining its severity. The severity of VUR can also be  
19  
20 easily assessed with distal ureter diameter ratio and VUR index score which can also  
21  
22 predict for resolution.[7-9]  
23  
24  
25  
26

27 Spontaneous resolution of VUR can be observed in about more than 80% of grades I and II,  
28  
29 around 45% of grade III, and less than 10% of grades IV and V.[10] Various treatment  
30  
31 modalities including antibiotic prophylaxis (AbxP), surgical (Sx Rx) or endoscopic  
32  
33 corrections (Endo Rx), and conservative treatment without antibiotic prophylaxis (no  
34  
35 AbxP) are used depending on the severity of VUR and physicians' preference.[11] Each  
36  
37 treatment's effectiveness varies in preventing UTI and renal damage. Success rate also  
38  
39 differs in each surgical correction method.[12, 13] With good resolution rates, nonoperative  
40  
41 management, such as AbxP and no AbxP, are preferred treatments for low grade VUR.  
42  
43 However, Sx Rx is reserved for high grade VUR due to a potential risk of renal  
44  
45 damage.[14]  
46  
47  
48  
49  
50

51 Previous meta-analytic studies[15-17] examined treatments mostly for low grade (I, II) and  
52  
53 high grade (III, IV, V). However, in practice, children with grade V VUR is associated with  
54  
55  
56  
57  
58  
59  
60

1  
2  
3  
4 a very high risk of recurrent UTI and renal scarring, and therefore, AbxP alone may not be  
5  
6 sufficient for these patients and rarely enrolled in randomized controlled study. On the  
7  
8 contrary, surgery is rarely used to treat grade I VUR patients. Having the high probability  
9  
10 of rapid spontaneous resolution in VUR grade I, and concerning the high incidence of  
11  
12 associated renal dysplasia or potential risk of renal damage in VUR grade V, the choice of  
13  
14 treatment for these two grades is clear and more standardized. Therefore, most randomized  
15  
16 control trials (RCTs) comparing AbxP, Endo Rx, or reimplantation include VUR grades II-  
17  
18 IV patients. Herein, the aim of this study is to compare the effectiveness of these treatment  
19  
20 modalities in managing children with VUR grades II, III, and IV by conducting a  
21  
22 systematic review and network meta-analysis.  
23  
24  
25  
26  
27  
28  
29  
30

## 31 **Methods**

### 32 **Search strategy**

33  
34  
35  
36  
37 A systematic search was conducted in different databases including Pubmed, Embase, and  
38  
39 Google scholar using both free text and MESH terms (vesicoureteral reflux; vesicoureteral  
40  
41 reimplantation; endoscopic treatment or antibiotic prophylaxis). All databases were  
42  
43 searched from their inceptions to December 2022 without any language restriction. The  
44  
45 search was performed according to the Preferred Reporting Items for Systematic Reviews  
46  
47 Involving a Network Meta-Analysis (PRISMA-NMA) statement. The number of included  
48  
49 and excluded studies were reported at each stage.  
50  
51  
52  
53  
54  
55  
56  
57  
58  
59  
60

## Selection criteria

Abstracts of the identified articles were manually reviewed, and full texts were assessed for those without clear eligibility. Only were RCT studies comparing any two of four treatments (vesicoureteral reimplantation, endoscopic treatment, antibiotic prophylaxis, or surveillance with no antibiotic prophylaxis) for managing primary VUR grades II-IV included in this study. Studies which examined treatments for VUR grades I-V and provided separate results for each grade were also eligible for inclusion.

Articles were excluded if treatment outcomes were not directly compared or if duplicate data on the same cohort were reported. Studies with primary VUR grade I or V and those with secondary VUR, such as posterior urethral valves, neurological abnormalities, other urological abnormalities, and kidney transplants, were also excluded.

## Treatment modalities

Different treatment modalities for VUR grades II-IV reported in the included studies were AbxP, no AbxP, Sx Rx, and Endo Rx.

## Data extraction

Two investigators (C.L. Chang and C.H. Chen) extracted the data from each eligible study, including urinary tract infection (UTI), renal scarring for both old lesion progression and new scars formation, as well as resolution of VUR by cases and renal units. Another four investigators (C.K Hsu, Stephen S.D. Yang and S.J. Chang) checked the accuracy of

1  
2  
3  
4 extracted data, and a custom piloted spreadsheet was used for comparing those data for  
5  
6 each variable of interest.  
7  
8

## 9 10 **Outcomes**

11  
12  
13 Primary outcome was to compare the rate of urinary tract infection (UTI) according to the  
14  
15 criteria defined by each study between treatment modalities.  
16  
17

18  
19 Secondary outcomes were the rate of worsening of previous renal scars (i.e. progression of  
20  
21 old lesions) and formation of new renal scars usually followed by technetium-99 m-labelled  
22  
23 dimercaptosuccinic acid (99mTc-DMSA) scintigraphy and also the resolution rate of VUR.  
24  
25

## 26 27 **Risk of bias assessment**

28  
29 The Cochrane Collaboration risk of bias tool (RoB2) was used, and risks of bias, such as  
30  
31 selection, performance, detection, attrition, and reporting bias, were evaluated for each  
32  
33 included study. Each item was rated as either low risk of bias, some concern (either lack of  
34  
35 information or uncertainty over the potential for bias) or high risk of bias.  
36  
37  
38  
39

## 40 41 **Statistical analysis**

42  
43 Pairwise comparisons between studies were performed by Revman 5.4 software  
44  
45 (www.cochrane.org), and R program software was used for conducting network meta-  
46  
47 analysis. Frequentist model was adopted using netmeta package for estimating each  
48  
49 treatment's effect. The statistical heterogeneity between the studies was measured by  $I^2$  and  
50  
51  $Q_{total}$  showing the overall inconsistency in the network. Network consistency was checked  
52  
53  
54  
55  
56  
57  
58  
59  
60



1  
2  
3  
4 with netsplit method. We conducted a pooled analysis of dichotomous outcomes using odds  
5 ratios (ORs) for pairwise comparisons and odds ratios in logarithmic scale (log ORs) for  
6 comparisons in network meta-analysis. Random-effects method was used to overcome the  
7 high heterogeneity between studies.  
8  
9  
10  
11  
12

### 13 14 15 16 **Certainty of the evidence**

17  
18 The certainty of the results from both pairwise comparisons and network meta-analysis  
19 were assessed with the methods provided in GRADE handbook. Overall certainty of  
20 evidence was based on risk of bias, inconsistency, indirectness, imprecision and publication  
21 bias. Each result was graded into high, moderate, low or very low certainty.  
22  
23  
24  
25  
26  
27  
28

### 29 30 **Patient and Public involvement statement**

31  
32 Patients or the public were not involved in the conduct of this systematic review and  
33 network meta-analysis study. The analyses were restricted to studies on children with VUR  
34 Grade II to IV. The main target audience includes pediatricians, urologists, nephrologists  
35 and clinicians who have special interest in children with VUR.  
36  
37  
38  
39  
40  
41  
42  
43

### 44 45 **Results**

#### 46 47 **Search strategy and study characteristics**

48  
49 The selection of articles was conducted according to the Preferred Reporting Items for  
50 Systematic Reviews and Meta-Analyses (PRISMA) guidelines, and a total of 820 studies  
51 were initially selected. A final sample of 11 studies including 1447 children with VUR  
52  
53  
54  
55  
56  
57  
58  
59  
60

1  
2  
3  
4 grades II-IV were included, and the detailed process of selection is demonstrated in Fig 1.  
5  
6 All 11 studies were randomized control trials and all of which were published in English  
7  
8 language. The oldest age of enrolled children was 18 years. Follow up periods varied from  
9  
10 1 to 5 years. Characteristics of the included studies are summarized in Table (1).  
11  
12  
13  
14  
15

### 16 **Risk of bias**

17  
18 Nearly half of the included studies reported unclear information about randomization,  
19  
20 allocation, and blinding of outcome assessment. Two studies[18, 19] had severe missing  
21  
22 outcome data, and they were rated as high risk of bias in missing outcome data. Half of the  
23  
24 included studies were considered for some concern as having bias in selection of reported  
25  
26 results. For the overall bias, approximately 20% of the included studies were considered  
27  
28 having a high risk of bias, and the results were summarized in Fig 2 (a) and (b).  
29  
30  
31  
32  
33

### 34 **Evaluation of inconsistency and fitness of the model of the network meta-analysis**

35  
36 The network evidence of UTI for four treatment modalities was demonstrated with network  
37  
38 graph (Fig 3) including a total of 9 studies. Our model showed two strong arms (AbxP vs  
39  
40 no AbxP and AbxP vs Sx Rx) each including 3 studies, and it consisted of a closed loop  
41  
42 between AbxP, Sx Rx, and Endo Rx. Both results of direct and indirect methods calculated  
43  
44 by the netsplit method did not show a significant difference between them. Therefore, no  
45  
46 inconsistency was found in our model. For the fitness of model, only the studies which  
47  
48 reported the outcomes of VUR grades II-IV were included, and fixed effect model was used  
49  
50 due to overall low heterogeneity among studies (Q value = 0.91).  
51  
52  
53  
54  
55  
56  
57  
58  
59  
60

## Synthesis of results

In this study, the effectiveness of treatment modalities was pooled analyzed with primary outcomes (urinary tract infection) simultaneously measured by network meta-analysis.

Other outcomes such as renal scarring and resolution by renal units were only analyzed by pairwise meta-analysis due to limited studies between treatments.

## Urinary tract infection

A total of 9 studies[19-27] including 1013 participants reported the incidence of post-treatment UTI. The definitions of UTI were positive urine culture and symptomatic or febrile UTI. Some studies did not report information about UTI definition.

## Pairwise comparisons of UTI between different treatment modalities

There was no significant difference in UTI recurrence among the treatment modalities. Sx Rx was associated with less UTI than AbxP, but the difference was not significant (OR = 0.75, 95% CI = 0.43 to 1.29, p = 0.3). Endo Rx showed a higher risk of UTI than AbxP, but the difference was not significant (OR = 2.03, 95% CI = 0.89 to 4.64, p = 0.09). Finally, there was no significant difference in UTI recurrence between AbxP or no AbxP (OR = 1.07, 95% CI = 0.51 to 2.24, p = 0.86). All results for each treatment comparison are reported in Table (2).

## Results from network meta-analysis

Sx Rx showed the lowest risk of UTI compared with other treatments reporting in Fig (4).

However, the mixed comparison results were not significant with low heterogeneity.

### Progression of old lesions

A total of 4 studies[18, 22-24] were pooled for the analysis. Three studies compared AbxP and Sx Rx, and one compared AbxP and no AbxP. The pooled result showed that AbxP had potential for more progression of old lesions than Sx Rx (OR = 1.23, 95% CI = 0.79 to 1.93,  $p = 0.36$ ), but the result was not significant.

### Formation of new renal scar

A total of 3 studies[18, 23, 27] with 641 participants were included. Two studies comparing AbxP and Sx Rx were pooled for pairwise comparison, and no significant result was found between them (OR = 0.86, 95% CI = 0.51 to 1.44,  $p = 0.56$ ). Another study compared AbxP, no AbxP, and Endo Rx, and the results for these comparisons are reported in Table (2).

### Resolution by renal units (RRU)

Of 4 studies[24-26, 28] which reported corrected VUR by renal units, 2 studies consisting of 160 participants compared Sx Rx and Endo Rx. The other 2 studies compared Sx Rx and AbxP as well as Endo Rx and AbxP. Sx Rx showed a significantly better resolution rate of VUR than Endo Rx (OR = 5.02, 95% CI = 1.47 to 17.13,  $p = 0.01$ ). Both Sx Rx and Endo Rx showed better resolutions than AbxP, and the results are reported in Table (2).

### Complications

1  
2  
3  
4 Most of the included studies did not report about complications except two studies.[19, 25]  
5  
6 Ureteral stricture is one of possible complications of Sx Rx. Long term report of IRS study  
7  
8 showed postoperative unilateral obstruction (6.6%, 10 in 151 patients) in which 7 patients  
9  
10 (4.7%) needed further surgery.[19] Garcia-Aparicio et al also reported mild postoperative  
11  
12 complications with hematuria (5.2%) and bladder spasm (5.2%).[25]  
13  
14  
15  
16  
17

### 18 **Certainty of the evidence**

19  
20 About two third of the results from pairwise comparison were rated as moderate certainty  
21  
22 as there were high risk of bias in randomization process and outcome data. Overall  
23  
24 certainty of the evidence and summary of findings table for pairwise comparison was  
25  
26 presented in table (3). For network meta-analysis, only surgical treatment was found having  
27  
28 moderate certainty and the rest having high certainty. Certainty of evidence for each  
29  
30 treatment was integrated with the results and the overall summary of findings were reported  
31  
32 in table (4).  
33  
34  
35  
36  
37  
38

### 39 **Discussion**

40  
41 To our knowledge, this is the first network meta-analysis that compared different treatment  
42  
43 modalities for patients with VUR grades II-IV. The effectiveness of each treatment in  
44  
45 preventing the occurrence of post-treatment UTI was simultaneously compared by  
46  
47 conducting network meta-analysis. Sx Rx showed the best outcome in reducing post-  
48  
49 treatment UTI among patients with VUR grades II-IV followed by AbxP, no AbxP, and  
50  
51 Endo Rx consecutively. However, mixed comparison results showed no significant  
52  
53 differences. Pairwise comparisons for post-treatment UTI, progression of old lesions, and  
54  
55  
56  
57  
58  
59  
60

1  
2  
3  
4 formation of new renal scar showed no significant differences between the treatment  
5 modalities. However, Sx Rx provided a better resolution rate of VUR grades II-IV than  
6  
7  
8  
9 Endo Rx and AbxP.

10  
11  
12  
13 Children with VUR have a high spontaneous resolution rate within the first 4-5 years of  
14 life.[29, 30] Male sex, young age, unilateral VUR have good resolution rate. Besides, it is  
15  
16  
17 also believed that VUR alone is not likely to cause renal damage without the presence of  
18  
19  
20  
21  
22  
23  
24  
25  
26  
27  
28  
29  
30  
31  
32  
33  
34  
35  
36  
37  
38  
39  
40  
41  
42  
43  
44  
45  
46  
47  
48  
49  
50  
51  
52  
53  
54  
55  
56  
57  
58  
59  
60  
UTI.[31] Risk factors for UTI includes young age, high grade VUR, female sex and  
circumcision status in boys. Presence of bladder bowel dysfunction is also one of the  
important factors that influence VUR resolution rate and increase UTI risk.[32]

ABxP is commonly used for children with VUR to prevent UTI recurrence. However,  
several studies have examined age, gender and VUR severity to determine the efficacy of  
AbxP, and the results remain controversial. Swedish reflux study [27] and RIVUR trial[33]  
supported using AbxP because of its significant reduction in UTI recurrence, but PRIVENT  
study[21] found a limited effect of AbxP. A recent meta-analysis[17] comparing all grades  
of VUR showed that recurrent UTI was less in AbxP than no AbxP group. In our study,  
there was no significant difference between AbxP and other treatments for UTI and renal  
damage. This may be due to differences in age, gender and VUR severity of included  
studies.

Antibiotic resistance is an emerging problem for AbxP,[34] and this may affect the  
treatment outcomes. Adverse effects of long-term antibiotic use such as allergic reaction,

1  
2  
3  
4 weaken immune system and *Clostridium difficile* infection should also be considered.

5  
6 Becoming less effectiveness of AbxP, active surveillance without AbxP can be an  
7  
8 alternative option. Being alert for febrile UTI and early treatment to prevent renal damage  
9  
10 are necessary. Therefore, understanding and compliance of the parents play an important  
11  
12 role for active surveillance.  
13  
14

15  
16  
17  
18 Ureteral reimplantation has been used for decades with the most successful outcome for the  
19  
20 correction of VUR. The principle of surgical correction is to mimic or strengthen the  
21  
22 antireflux mechanism by creating the longer ureteral segment passing the tunnel between  
23  
24 bladder mucosa and muscularis propria. Lich–Gregoir extravesical antireflux technique,  
25  
26 Cohen intravesical reimplantation, and Politano–Leadbetter combined intra- and  
27  
28 extravesical reimplantation technique are most commonly used methods.[35] Sx Rx  
29  
30 included in our study are open ureteral reimplantation methods, mostly Cohen and  
31  
32 Politano-Leadbetter technique. Despite a significant better resolution by renal units in Sx  
33  
34 Rx, no significant difference was found in recurrent UTI and renal damage in our study.  
35  
36  
37  
38 These results coincide with other meta-analyses[16, 17].  
39  
40  
41  
42

43  
44 Another treatment option for VUR is Endo Rx which has been introduced over the last two  
45  
46 decades [36]. Different bulking agents can be injected at ureteric orifice with the  
47  
48 Traditional Subureteric Teflon Injection (STING) technique or Hydrodistension  
49  
50 implantation technique (HIT) including the double HIT.[37] However, the choice of  
51  
52 bulking agents may impact the safety and efficacy of Endo Rx as granuloma formation due  
53  
54 to foreign body reaction, migration from injection site and periureteric fibrosis.  
55  
56  
57  
58  
59  
60

1  
2  
3  
4 Dextranomer/ hyaluronic acid (Dx/HA) showed low complication rates with short-term  
5  
6 hematuria (0.2-0.8%), ureteral obstruction (0.5-1.3%), calcification (0.5%) and late ureteral  
7  
8 implantation (2.7%).[38] Although Endo Rx showed significantly lower resolution rate  
9  
10 than Sx Rx, it is less invasive and uses easier technique than Sx Rx. However, clinicians  
11  
12 must balance risks and benefits of each procedure as well as their own surgical experiences.  
13  
14

15  
16  
17  
18 Limitations of this study should be addressed. For low risks of bias, only randomized  
19  
20 control studies were included in this study. As many studies did not report separate data for  
21  
22 VUR grades II-IV, they were excluded from current study for network consistency and  
23  
24 transitivity. Mixed treatment comparison could be performed by network meta-analysis  
25  
26 only for UTI recurrence, and the rest parameters could only be compared with pairwise  
27  
28 comparisons. Moreover, robotic assisted surgery has been used to correct VUR in children  
29  
30 with body weight >10 kg [39, 40] while our study did not include it in this study.  
31  
32

33  
34 Therefore, future research should consider including robotic assisted surgery as one of the  
35  
36 treatment modalities. Last, but not least, our study could not consider patients' age, febrile  
37  
38 or symptomatic UTI, follow up times, and publication years because of limited included  
39  
40 studies.  
41  
42

#### 43 44 45 **Conclusion**

46  
47  
48 The results from both pairwise and network meta-analyses suggest that there is probably no  
49  
50 difference between the treatments concerning their impact on UTI recurrence, progression  
51  
52 of previous renal scars, or the formation of new renal scars in children with VUR Grade II-  
53  
54 IV. These findings could offer valuable evidence-based insights for guiding treatment  
55  
56  
57  
58  
59  
60



selection, emphasizing the importance of individualized approaches based on each patient's specific risk factors.

## References

1. Chandra, M., *Reflux nephropathy, urinary tract infection, and voiding disorders*. *Curr Opin Pediatr*, 1995. **7**(2): p. 164-70.
2. Sargent, M.A., *What is the normal prevalence of vesicoureteral reflux?* *Pediatr Radiol*, 2000. **30**(9): p. 587-93.
3. Hunziker, M., E. Colhoun, and P. Puri, *Prevalence and predictors of renal functional abnormalities of high grade vesicoureteral reflux*. *J Urol*, 2013. **190**(4 Suppl): p. 1490-4.
4. Hoberman, A., et al., *Imaging studies after a first febrile urinary tract infection in young children*. *N Engl J Med*, 2003. **348**(3): p. 195-202.
5. Keren, R., et al., *Risk Factors for Recurrent Urinary Tract Infection and Renal Scarring*. *Pediatrics*, 2015. **136**(1): p. e13-21.
6. Lebowitz, R.L., et al., *International system of radiographic grading of vesicoureteric reflux. International Reflux Study in Children*. *Pediatr Radiol*, 1985. **15**(2): p. 105-9.
7. Arlen, A.M., et al., *Validation of the ureteral diameter ratio for predicting early spontaneous resolution of primary vesicoureteral reflux*. *J Pediatr Urol*, 2017. **13**(4): p. 383.e1-383.e6.
8. Garcia-Roig, M., et al., *Vesicoureteral Reflux Index: Predicting Primary Vesicoureteral Reflux Resolution in Children Diagnosed after Age 24 Months*. *J Urol*, 2017. **197**(4): p. 1150-1157.
9. Ntoulia, A., et al., *Contrast-enhanced voiding urosonography (ceVUS) with the intravesical administration of the ultrasound contrast agent Optison™ for vesicoureteral reflux detection in children: a prospective clinical trial*. *Pediatr Radiol*, 2018. **48**(2): p. 216-226.
10. Shimada, K., et al., *[Spontaneous resolution of reflux in children with primary VUR]*. *Nihon Hinyokika Gakkai Zasshi*, 1990. **81**(7): p. 982-7.
11. Springer, A. and R. Subramaniam, *Relevance of current guidelines in the management of VUR*. *Eur J Pediatr*, 2014. **173**(7): p. 835-43.
12. Teixeira, C.B.B., M.A.d.P. Cançado, and J.T.d.A. Carvalhaes, *Primary vesicoureteral reflux: conservative therapy or surgical intervention*. *Brazilian Journal of Nephrology*, 2014. **36**: p. 10-17.
13. Williams, G., E.M. Hodson, and J.C. Craig, *Interventions for primary vesicoureteric reflux*. *Cochrane Database Syst Rev*, 2019. **2**(2): p. Cd001532.
14. Teixeira, C.B., M.A. Cançado, and J.T. Carvalhaes, *[Primary vesicoureteral reflux: conservative therapy or surgical intervention]*. *J Bras Nefrol*, 2014. **36**(1): p. 10-7.

15. Wheeler, D., et al., *Antibiotics and surgery for vesicoureteric reflux: a meta-analysis of randomised controlled trials*. Arch Dis Child, 2003. **88**(8): p. 688-94.
16. Mina-Riascos, S.H., N. Fernández, and H.A. García-Perdomo, *Effectiveness and risks of endoscopic management compared to vesicoureteral reimplantation in patients with high-grade vesicoureteral reflux: systematic review and network meta-analysis*. Eur J Pediatr, 2021. **180**(5): p. 1383-1391.
17. Xie, M., et al., *Do Various Treatment Modalities of Vesicoureteral Reflux Have Any Adverse Effects in Pediatric Patients? A Meta-Analysis*. Urol Int, 2021. **105**(11-12): p. 1002-1010.
18. Olbing, H., et al., *Renal scars and parenchymal thinning in children with vesicoureteral reflux: a 5-year report of the International Reflux Study in Children (European branch)*. The Journal of urology, 1992. **148**(5): p. 1653-1656.
19. Jodal, U., et al., *Ten-year results of randomized treatment of children with severe vesicoureteral reflux. Final report of the International Reflux Study in Children*. Pediatric Nephrology, 2006. **21**(6): p. 785-792.
20. Hari, P., et al., *Antibiotic prophylaxis in the management of vesicoureteric reflux: a randomized double-blind placebo-controlled trial*. Pediatr Nephrol, 2015. **30**(3): p. 479-86.
21. Craig, J.C., et al., *Antibiotic prophylaxis and recurrent urinary tract infection in children*. New England Journal of Medicine, 2009. **361**(18): p. 1748-1759.
22. Pennesi, M., et al., *Is antibiotic prophylaxis in children with vesicoureteral reflux effective in preventing pyelonephritis and renal scars? A randomized, controlled trial*. Pediatrics, 2008. **121**(6): p. e1489-94.
23. Weiss, R., et al., *Results of a randomized clinical trial of medical versus surgical management of infants and children with grades III and IV primary vesicoureteral reflux (United States)*. The Journal of urology, 1992. **148**(5 Part 2): p. 1667-1673.
24. Group, B.R.S., *Prospective trial of operative versus non-operative treatment of severe vesicoureteric reflux: two years' observation in 96 children*. British Medical Journal (Clinical Research Edition), 1983: p. 171-174.
25. Garcia-Aparicio, L., et al., *Randomized clinical trial comparing endoscopic treatment with dextranomer hyaluronic acid copolymer and Cohen's ureteral reimplantation for vesicoureteral reflux: long-term results*. J Pediatr Urol, 2013. **9**(4): p. 483-7.
26. Capozza, N. and P. Caione, *Dextranomer/hyaluronic acid copolymer implantation for vesico-ureteral reflux: a randomized comparison with antibiotic prophylaxis*. J Pediatr, 2002. **140**(2): p. 230-4.
27. Brandström, P., et al., *The Swedish reflux trial: review of a randomized, controlled trial in children with dilating vesicoureteral reflux*. J Pediatr Urol, 2011. **7**(6): p. 594-600.
28. Salih, E.M., et al., *Comparison of Subureteral Endoscopic Injection of Dextranomer/Hyaluronic Acid and Lich-Gregoir Ureteral Reimplantation in the*

- 1  
2  
3  
4  
5  
6  
7  
8  
9  
10  
11  
12  
13  
14  
15  
16  
17  
18  
19  
20  
21  
22  
23  
24  
25  
26  
27  
28  
29  
30  
31  
32  
33  
34  
35  
36  
37  
38  
39  
40  
41  
42  
43  
44
- Treatment of Pediatric Primary Vesicoureteral Reflux: A Prospective Randomized Study.* J Laparoendosc Adv Surg Tech A, 2021. **31**(6): p. 719-723.
29. Estrada, C.R., Jr., et al., *Nomograms for predicting annual resolution rate of primary vesicoureteral reflux: results from 2,462 children.* J Urol, 2009. **182**(4): p. 1535-41.
30. Hajiyev, P. and B. Burgu, *Contemporary Management of Vesicoureteral Reflux.* Eur Urol Focus, 2017. **3**(2-3): p. 181-188.
31. Swerkersson, S., et al., *Urinary tract infection in small children: the evolution of renal damage over time.* Pediatr Nephrol, 2017. **32**(10): p. 1907-1913.
32. Elder, J.S. and M. Diaz, *Vesicoureteral reflux--the role of bladder and bowel dysfunction.* Nat Rev Urol, 2013. **10**(11): p. 640-8.
33. Mattoo, T.K., et al., *Renal scarring in the randomized intervention for children with vesicoureteral reflux (RIVUR) trial.* Clinical Journal of the American Society of Nephrology, 2016. **11**(1): p. 54-61.
34. Cheng, C.H., et al., *Antibiotic resistance patterns of community-acquired urinary tract infections in children with vesicoureteral reflux receiving prophylactic antibiotic therapy.* Pediatrics, 2008. **122**(6): p. 1212-7.
35. Austin, J.C. and C.S. Cooper, *Vesicoureteral reflux: surgical approaches.* Urol Clin North Am, 2004. **31**(3): p. 543-57, x.
36. Calisti, A., et al., *Endoscopic subureteral injection for vesicoureteral reflux and the risk of overtreatment.* Minerva Pediatr, 2009. **61**(1): p. 1-7.
37. Yap, T.L., et al., *STING versus HIT technique of endoscopic treatment for vesicoureteral reflux: A systematic review and meta-analysis.* J Pediatr Surg, 2016. **51**(12): p. 2015-2020.
38. Kirsch, A.J., C.S. Cooper, and G. Läckgren, *Non-Animal Stabilized Hyaluronic Acid/Dextranomer Gel (NASHA/Dx, Deflux) for Endoscopic Treatment of Vesicoureteral Reflux: What Have We Learned Over the Last 20 Years?* Urology, 2021. **157**: p. 15-28.
39. Finkelstein, J.B., et al., *How to decide which infant can have robotic surgery? Just do the math.* J Pediatr Urol, 2015. **11**(4): p. 170.e1-4.
40. Herz, D., et al., *Robot-assisted laparoscopic extravesical ureteral reimplant: A critical look at surgical outcomes.* J Pediatr Urol, 2016. **12**(6): p. 402.e1-402.e9.

## Acknowledgement

45  
46  
47  
48  
49  
50  
51  
52  
53  
54  
55  
56  
57  
58  
59  
60

The authors would like to thank the team of Taipei Tzu Chi Hospital Library and the research team of Taipei Tzu Chi Hospital for their support in the database search and the development of this paper.

## Funding

This study was supported by a grant from the Taipei Tzu Chi Hospital, Buddhist Tzu Chi Medical Foundation (Grant No. TCRD-TPE-110-12)

## Author Contributions Statement

C.L Chang and C.H Chen conceptualized and designed the study, performed data collection, data analysis and drafted the original manuscript. S.D Yang, C.K Hsu and S.J. Chang coordinated and supervised data collection, and critically reviewed the manuscript. All authors reviewed and approved the final manuscript as submitted and agree to be accountable for all aspects of the work.

## Legends to The Figures

**Fig. 1** Research flow chart

**Fig. 2(a)** Risk of bias graph: each risk of bias component displayed as percentage across papers

**Fig. 2(b)** Risk of bias summary: each risk of bias component for each paper

**Fig. 3** Network graph of each treatment for UTI

**Fig. 4** Comparison of UTI recurrence after each treatment of VUR

**Table 1** Study characteristics of included studies

**Table 2** Results for pairwise comparisons of different treatment modalities

**Table 3** Summary of findings of GRADE analysis for pairwise comparisons

**Table 4** Summary of findings of GRADE analysis for network meta-analysis

1  
2  
3  
4 **Declarations**  
5

6 **Ethics approval**  
7

8  
9 This is a systematic review and network meta-analysis study. The Research Ethics  
10  
11 Committee has confirmed that no ethical approval is required and there is no clinical trial  
12  
13 registration.  
14

15 **Conflict of interest**  
16

17  
18 None.  
19

20 **Data availability statement**  
21

22 Data are available on reasonable request.  
23  
24  
25  
26  
27  
28  
29  
30  
31  
32  
33  
34  
35  
36  
37  
38  
39  
40  
41  
42  
43  
44  
45  
46  
47  
48  
49  
50  
51  
52  
53  
54  
55  
56  
57  
58  
59  
60

**Table (1) Study characteristics of included studies**

| <b>Author/year</b>              | <b>Country</b> | <b>VUR Grade</b>                        | <b>Age</b> | <b>Follow up</b> | <b>UTI definition</b> | <b>Comparisons</b>         |
|---------------------------------|----------------|-----------------------------------------|------------|------------------|-----------------------|----------------------------|
| <b>Hari 2015[20]</b>            | India          | VUR grade III, IV                       | <12 yrs    | 1 yr             | (+) UC                | AbxP vs no AbxP            |
| <b>Craig 2009[21]</b>           | Australia      | VUR grade III, IV                       | <18 yrs    | 1 yrs            | (+) UC                | AbxP vs no AbxP            |
| <b>Pennesi 2008[22]</b>         | Italy          | VUR grade II, III, IV                   | <2.5 yrs   | 4 yrs            | Febrile UTI           | AbxP vs no AbxP            |
| <b>Olbing 1992[18]</b>          | Germany        | VUR grade III, IV                       | <11 yrs    | 5 yrs            | No information        | AbxP vs Sx Rx              |
| <b>Jodal 2006[19]</b>           | US             | VUR grade III, IV                       | <11 yrs    | 5 yrs            | (+) UC                | AbxP vs Sx Rx              |
| <b>Weiss 1992[23]</b>           | US             | VUR grade III, IV                       | < 10 yrs   | 4.5 yrs          | No information        | AbxP vs Sx Rx              |
| <b>BRSg 1983[24]</b>            | UK             | VUR grade III or grade II with scarring | >1 yr      | 2 yrs            | (+) UC                | Sx Rx vs AbxP              |
| <b>Garcia-Aparicio 2013[25]</b> | Spain          | VUR grade II, III, IV                   | >1 yr      | 5 yrs            | No information        | Endo Rx vs Sx Rx           |
| <b>Capozza 2002[26]</b>         | Italy          | VUR grade II, III, IV                   | >1 yr      | 1 yr             | (+) UC                | Endo Rx vs AbxP            |
| <b>Brandstrom 2011[27]</b>      | Sweden         | VUR grade III, IV                       | 1-2 yrs    | 2 yrs            | Febrile UTI           | Endo Rx vs AbxP vs no AbxP |
| <b>Salih 2021[28]</b>           | Egypt          | VUR grade III, IV                       | 1- 10 yrs  | 2 yrs            | No information        | Endo Rx vs Sx Rx           |

*VUR: vesicoureteral reflux, UC: urine culture, UTI: urinary tract infection, AbxP: antibiotic prophylaxis, Sx Rx: surgical treatment, Endo Rx: endoscopic treatment*

**Table (2) Results for pairwise comparisons of different treatment modalities**

| Outcomes                        | Treatment comparisons<br>Treatment (1) vs (2) -<br>references of included<br>studies | Treatment (1)<br>Total E/C<br>(n/n) | Treatment (2)<br>Total E/C (n/n) | OR (95%CI)          |
|---------------------------------|--------------------------------------------------------------------------------------|-------------------------------------|----------------------------------|---------------------|
| UTI                             | Sx Rx vs AbxP - [20-22]                                                              | 50/238                              | 63/235                           | 0.75(0.43,1.29)     |
|                                 | Endo Rx vs AbxP -[26, 27]                                                            | 20/105                              | 10/90                            | 2.03(0.89,4.64)     |
|                                 | AbxP vs No AbxP -[19, 23,<br>24]                                                     | 26/152                              | 24/145                           | 1.07(0.51,2.24)     |
|                                 | Endo Rx vs Sx Rx -[25]                                                               | 2/22                                | 0/19                             | Not estimable       |
| Progression of<br>old lesions   | AbxP vs Sx Rx - [18, 23, 24]                                                         | 52/270                              | 43/264                           | 1.23(0.79,1.93)     |
|                                 | AbxP vs No AbxP -[22]                                                                | 1/50                                | 9/50                             | 0.09(0.01,0.76)     |
| Formation of<br>new renal scars | AbxP vs Sx Rx - [18, 23]                                                             | 33/223                              | 36/215                           | 0.86(0.51,1.44)     |
|                                 | AbxP vs No AbxP - [27]                                                               | 0/69                                | 9/68                             | Not estimable       |
|                                 | AbxP vs Endo Rx - [27]                                                               | 0/69                                | 6/66                             | Not estimable       |
|                                 | Endo Rx vs No Abxb - [27]                                                            | 6/66                                | 9/68                             | 0.66(0.22,1.96)     |
| RRU                             | Sx Rx vs Endo Rx - [25, 28]                                                          | 77/80                               | 66/80                            | 5.02(1.47,17.13)    |
|                                 | Sx Rx vs AbxP - [24]                                                                 | 67/69                               | 17/65                            | 94.59(20.87,428.74) |
|                                 | Endo Rx vs AbxP - [26]                                                               | 40/52                               | 10/30                            | 8.33(3.14,22.13)    |

*E/C: events/cases, OR: odd ratio, UTI: urinary tract infection, Sx Rx: surgical treatment, AbxP: antibiotic prophylaxis, Endo Rx: endoscopic treatment, RRU: resolution by renal units*

**Table (3) Summary of findings of GRADE analysis for pairwise comparisons**

| Outcomes                                                                   | № of participants (studies) Follow-up | Certainty of the evidence (GRADE) | Relative effect (95% CI)      | Anticipated absolute effects |                                                    |
|----------------------------------------------------------------------------|---------------------------------------|-----------------------------------|-------------------------------|------------------------------|----------------------------------------------------|
|                                                                            |                                       |                                   |                               | Risk with Control            | Risk difference with Intervention                  |
| UTI recurrence (AbxP vs No AbxP) follow-up: range 1 years to 4 years       | 297 (3 RCTs)                          | ⊕⊕⊕⊕ High                         | <b>OR 1.07</b> (0.51 to 2.24) | 166 per 1,000                | <b>10 more per 1,000</b> (74 fewer to 142 more)    |
| UTI recurrence (Sx Rx vs AbxP) follow-up: range 2 years to 5 years         | 473 (3 RCTs)                          | ⊕⊕⊕○ Moderate <sup>a</sup>        | <b>OR 0.75</b> (0.43 to 1.29) | 268 per 1,000                | <b>53 fewer per 1,000</b> (132 fewer to 53 more)   |
| UTI recurrence (Endo Rx vs AbxP) follow-up: range 1 years to 2 years       | 195 (2 RCTs)                          | ⊕⊕⊕⊕ High                         | <b>OR 2.03</b> (0.89 to 4.64) | 111 per 1,000                | <b>91 more per 1,000</b> (11 fewer to 256 more)    |
| UTI recurrence (Endo Rx vs Sx Rx) follow-up: median 1 years                | 41 (1 RCT)                            | ⊕⊕⊕⊕ High                         | not estimable                 | 0 per 1,000                  | <b>0 fewer per 1,000</b> (0 fewer to 0 fewer)      |
| Progression of old lesion (AbxP vs Sx Rx) follow-up: range 2 to 5 years    | 534 (3 RCTs)                          | ⊕⊕⊕○ Moderate <sup>a</sup>        | <b>OR 1.23</b> (0.79 to 1.93) | 163 per 1,000                | <b>30 more per 1,000</b> (30 fewer to 110 more)    |
| Progression of old lesion (AbxP vs No AbxP) follow-up: median 4 years      | 100 (1 RCT)                           | ⊕⊕⊕⊕ High                         | <b>OR 0.09</b> (0.01 to 0.76) | 180 per 1,000                | <b>161 fewer per 1,000</b> (178 fewer to 37 fewer) |
| Formation of new renal scars (AbxP vs Sx Rx) follow-up: range 4 to 5 years | 438 (2 RCTs)                          | ⊕⊕⊕○ Moderate <sup>a</sup>        | <b>OR 0.86</b> (0.51 to 1.44) | 167 per 1,000                | <b>20 fewer per 1,000</b> (74 fewer to 57 more)    |



| Outcomes                                                                    | № of participants (studies) Follow-up | Certainty of the evidence (GRADE) | Relative effect (95% CI)          | Anticipated absolute effects |                                                  |
|-----------------------------------------------------------------------------|---------------------------------------|-----------------------------------|-----------------------------------|------------------------------|--------------------------------------------------|
|                                                                             |                                       |                                   |                                   | Risk with Control            | Risk difference with Intervention                |
| Formation of new renal scars (Endo Rx vs No AbxP) follow-up: median 2 years | 134 (1 RCT)                           | ⊕⊕⊕○ Moderate <sup>b</sup>        | <b>OR 0.66</b> (0.22 to 1.96)     | 132 per 1,000                | <b>41 fewer per 1,000</b> (100 fewer to 98 more) |
| RRU (Sx Rx vs Endo Rx) follow-up: range 2 to 5 years                        | 160 (2 RCTs)                          | ⊕⊕⊕○ Moderate <sup>b</sup>        | <b>OR 5.02</b> (1.47 to 17.13)    | 825 per 1,000                | <b>134 more per 1,000</b> (49 more to 163 more)  |
| RRU (Sx Rx vs AbxP) follow-up: median 2 years                               | 134 (1 RCT)                           | ⊕⊕⊕○ Moderate <sup>b</sup>        | <b>OR 94.59</b> (20.87 to 428.74) | 262 per 1,000                | <b>709 more per 1,000</b> (619 more to 732 more) |
| RRU (Endo Rx vs AbxP) follow-up: median 1 years                             | 82 (1 RCT)                            | ⊕⊕⊕○ Moderate <sup>b</sup>        | <b>OR 8.33</b> (3.14 to 22.13)    | 333 per 1,000                | <b>473 more per 1,000</b> (278 more to 584 more) |

\*The risk in the intervention group (and its 95% confidence interval) is based on the assumed risk in the comparison group and the relative effect of the intervention (and its 95% CI).

CI: confidence interval; OR: odds ratio

#### GRADE Working Group grades of evidence

**High certainty:** we are very confident that the true effect lies close to that of the estimate of the effect.

**Moderate certainty:** we are moderately confident in the effect estimate: the true effect is likely to be close to the estimate of the effect, but there is a possibility that it is substantially different.

**Low certainty:** our confidence in the effect estimate is limited: the true effect may be substantially different from the estimate of the effect.

**Very low certainty:** we have very little confidence in the effect estimate: the true effect is likely to be substantially different from the estimate of effect.

#### Explanations

a. Unclear explanation of randomization process in two studies and some missing data in one study

b. Unclear explanation of randomization process

**Table (4) Summary of findings of GRADE analysis for network meta-analysis**

Patient or population: VUR Grade II-IV  
 Setting: Various treatment modalities in children with VUR Grade II-IV  
 Interventions: Surgical, Endoscopic and Conservative treatment  
 Comparison: Antibiotic prophylaxis  
 Outcome: UTI recurrence

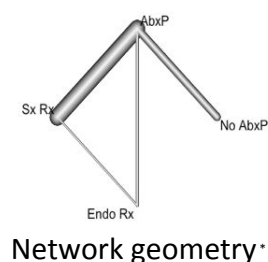

| Total studies: 9 RCTs<br>Total participants:<br>1013 | NMA estimate<br>effect**<br>(95% CI) | NMA Certainty<br>in the evidence | Ranking***<br>(P-score) | Interpretation          |
|------------------------------------------------------|--------------------------------------|----------------------------------|-------------------------|-------------------------|
| Surgical<br>treatment<br>(Sx Rx)                     | -0.26<br>(-0.54 to 0.02)             | ⊕⊕⊕○<br>Moderate <sup>a</sup>    | 0.85                    | Probably<br>superior    |
| Antibiotic<br>prophylaxis<br>(AbxP)                  | Reference<br>comparator              | Reference<br>comparator          | 0.43                    | Reference<br>comparator |
| Endoscopic<br>treatment<br>(Endo Rx)                 | 0.2<br>(-1.41 to 1.81)               | ⊕⊕⊕⊕<br>High                     | 0.38                    | Probably<br>inferior    |
| Conservative<br>treatment<br>(No AbxP)               | 0.15<br>(-0.45 to 0.75)              | ⊕⊕⊕⊕<br>High                     | 0.31                    | Probably<br>inferior    |

**NMA-SoF table definitions**

\*Lines represent direct comparisons

\*\*Network estimate effects are reported as Log OR and the results are expressed in 95% confident interval since the frequentist model has been conducted.

\*\*\*Ranking is calculated by P-score by netrank function

**GRADE Working Group grades of evidence**

**High certainty:** we are very confident that the true effect lies close to that of the estimate of the effect.

**Moderate certainty:** we are moderately confident in the effect estimate: the true effect is likely to be close to the estimate of the effect, but there is a possibility that it is substantially different.

**Low certainty:** our confidence in the effect estimate is limited: the true effect may be substantially different from the estimate of the effect.

**Very low certainty:** we have very little confidence in the effect estimate: the true effect is likely to be substantially different from the estimate of effect.

**Explanation**

a. Unclear explanation of randomization process in two studies and some missing data in one study

1  
2  
3  
4  
5  
6  
7  
8  
9  
10  
11  
12  
13  
14  
15  
16  
17  
18  
19  
20  
21  
22  
23  
24  
25  
26  
27  
28  
29  
30  
31  
32  
33  
34  
35  
36  
37  
38  
39  
40  
41  
42  
43  
44  
45  
46  
47  
48  
49  
50  
51  
52  
53  
54  
55  
56  
57  
58  
59  
60

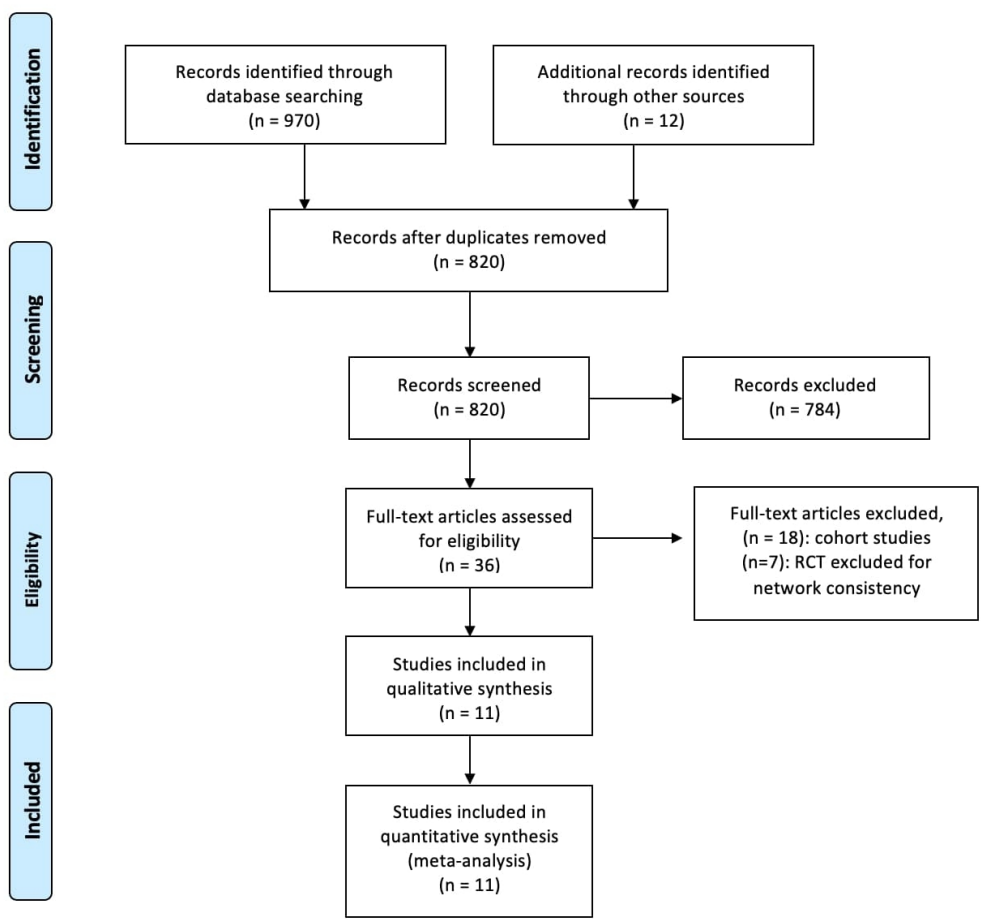

435x413mm (72 x 72 DPI)

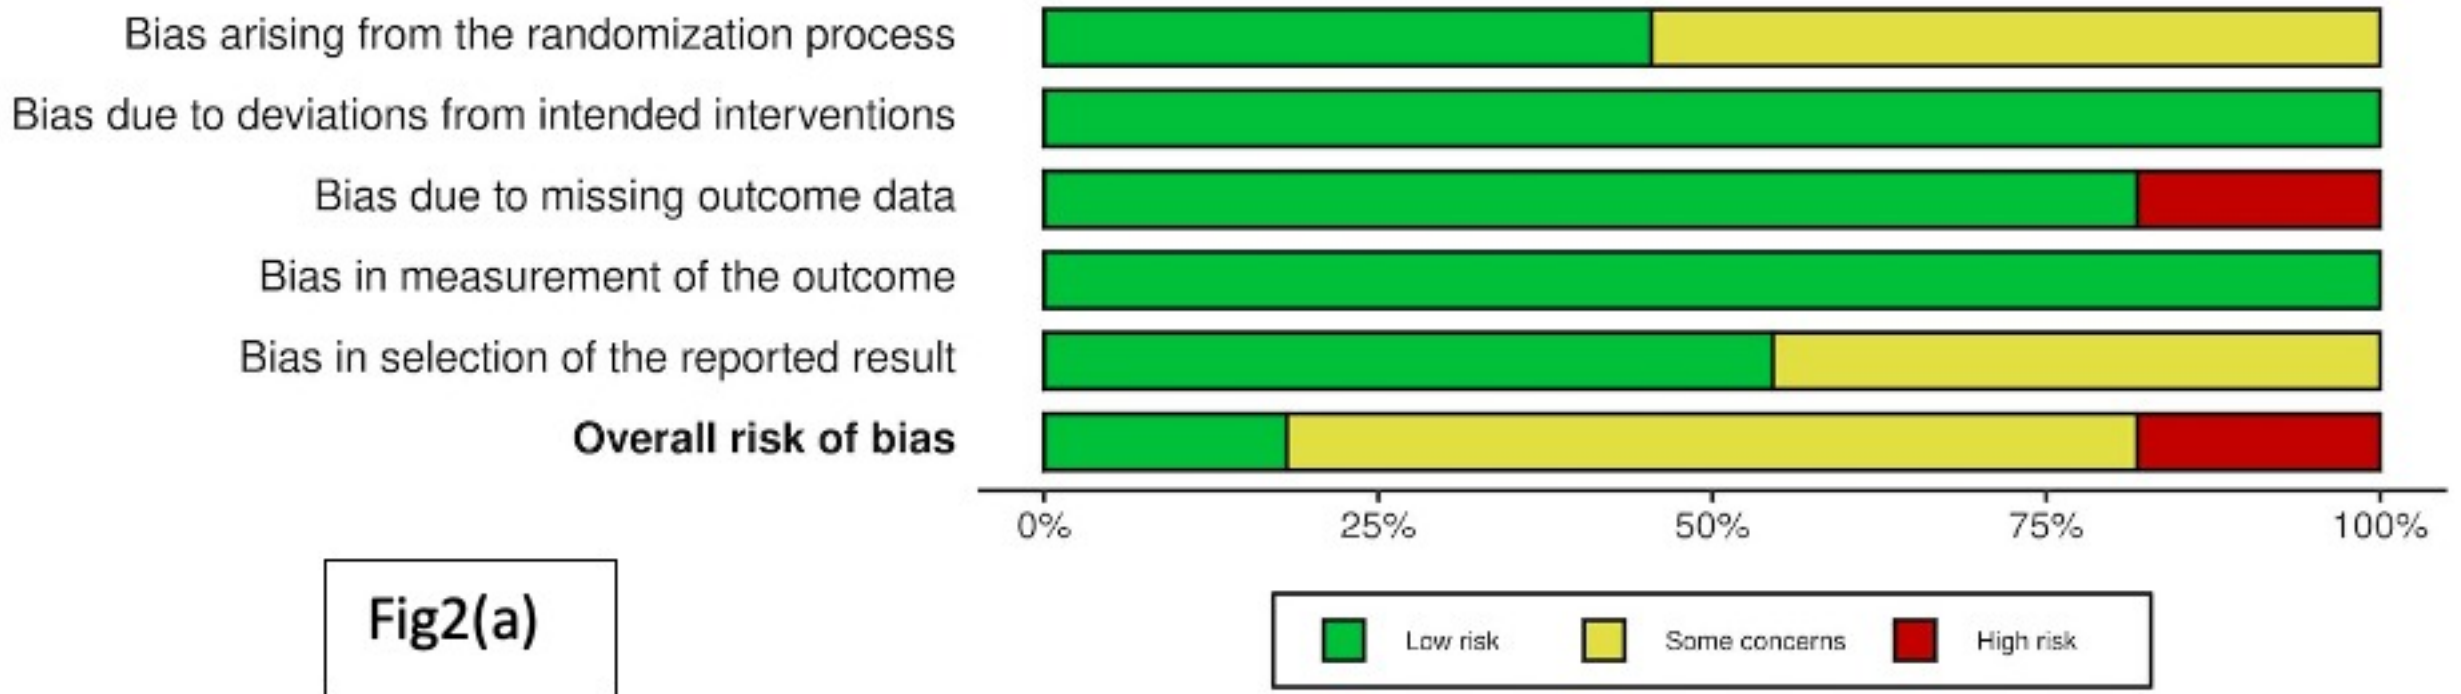

Fig2(a)

**Risk of bias domains**

| Study                | D1        | D2 | D3 | D4 | D5 | Overall |
|----------------------|-----------|----|----|----|----|---------|
|                      | Hari 2015 | +  | +  | +  | +  | +       |
| Craig 2009           | +         | +  | +  | +  | +  | +       |
| Pennesi 2008         | +         | +  | +  | +  | -  | -       |
| Olbing 1992          | -         | +  | X  | +  | +  | X       |
| Jodal 2006           | +         | +  | X  | +  | +  | X       |
| Weiss 1992           | -         | +  | +  | +  | +  | -       |
| BRSO 1983            | -         | +  | +  | +  | -  | -       |
| Garcia-Aparicio 2013 | +         | +  | +  | +  | -  | -       |
| Capozza 2002         | -         | +  | +  | +  | +  | -       |
| Brandstrom 2011      | -         | +  | +  | +  | -  | -       |
| Salih 2021           | -         | +  | +  | +  | -  | -       |

Fig2(b)

Domains:  
 D1: Bias arising from the randomization process.  
 D2: Bias due to deviations from intended intervention.  
 D3: Bias due to missing outcome data.  
 D4: Bias in measurement of the outcome.  
 D5: Bias in selection of the reported result.

Judgement  
 X High  
 - Some concerns  
 + Low

1  
2  
3  
4  
5  
6  
7  
8  
9  
10  
11  
12  
13  
14  
15  
16  
17  
18  
19  
20  
21  
22  
23  
24  
25  
26  
27  
28  
29  
30  
31  
32  
33  
34  
35  
36  
37  
38  
39  
40  
41  
42  
43  
44  
45  
46  
47  
48  
49  
50  
51  
52  
53  
54  
55  
56  
57  
58  
59  
60



228x150mm (72 x 72 DPI)

1  
2  
3  
4  
5  
6  
7  
8  
9  
10  
11  
12  
13  
14  
15  
16  
17  
18  
19  
20  
21  
22  
23  
24  
25  
26  
27  
28  
29  
30  
31  
32  
33  
34  
35  
36  
37  
38  
39  
40  
41  
42  
43  
44  
45  
46  
47  
48  
49  
50  
51  
52  
53  
54  
55  
56  
57  
58  
59  
60

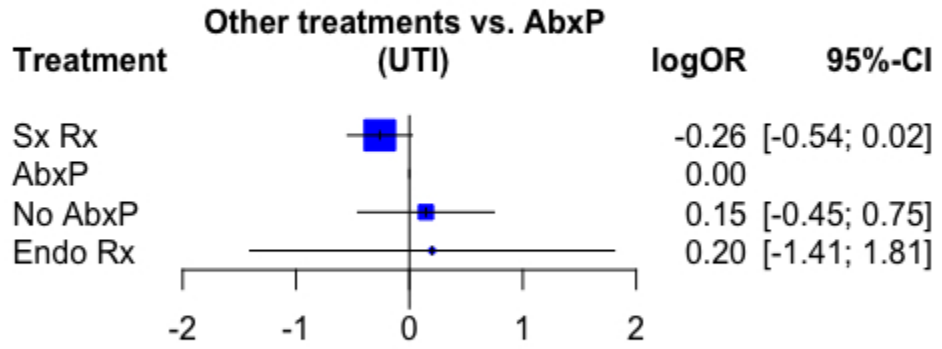

176x116mm (72 x 72 DPI)
